# Supplementary material for: Temporal patterns of hypoglycaemia and burden of sulfonylurea-related hypoglycaemia in UK hospitals: a retrospective multicentre audit of hospitalised patients with diabetes
Source: PubMed Central journal article supplement — BMJ Open. 2014 Jul 9;4(7):e005165. doi: 10.1136/bmjopen-2014-005165 (PMC4091462; doi:10.1136/bmjopen-2014-005165), 2014-07-09
Supplement: bmjopen-2014-005165.draft_revisions.pdf [file bmjopen-2014-005165.draft_revisions.pdf]

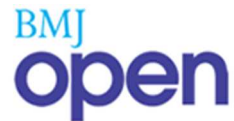

**Temporal patterns of hypoglycaemia and burden of sulphonylurea related hypoglycaemia in UK hospitals: a retrospective multi-centre audit of hospitalised patients with diabetes**

|                                 |                                                                                                                                                                         |
|---------------------------------|-------------------------------------------------------------------------------------------------------------------------------------------------------------------------|
| Journal:                        | <i>BMJ Open</i>                                                                                                                                                         |
| Manuscript ID:                  | bmjopen-2014-005165                                                                                                                                                     |
| Article Type:                   | Research                                                                                                                                                                |
| Date Submitted by the Author:   | 11-Mar-2014                                                                                                                                                             |
| Complete List of Authors:       | Rajendran, Rajesh; Ipswich Hospital, The Diabetes Centre Kerry, Christopher; Ipswich Hospital, The Diabetes Centre Rayman, Gerry; Ipswich Hospital, The Diabetes Centre |
| <b>Primary Subject Heading</b>: | Diabetes and endocrinology                                                                                                                                              |
| Secondary Subject Heading:      | Diabetes and endocrinology                                                                                                                                              |
| Keywords:                       | DIABETES & ENDOCRINOLOGY, General diabetes < DIABETES & ENDOCRINOLOGY, INTERNAL MEDICINE, Diabetes & endocrinology < INTERNAL MEDICINE                                  |
|                                 |                                                                                                                                                                         |

SCHOLARONE™  
Manuscripts

**Original article:****Title:**

Temporal patterns of hypoglycaemia and burden of sulphonylurea related hypoglycaemia in UK hospitals: a retrospective multi-centre audit of hospitalised patients with diabetes

**Correspondence to:**

Dr Gerry Rayman

Diabetes Centre, The Ipswich Hospital NHS Trust, Heath Road, Ipswich, IP4 5PD, UK

Email: [gerry.rayman@ipswichhospital.nhs.uk](mailto:gerry.rayman@ipswichhospital.nhs.uk)

Phone: 00441473704193

Fax: 00441473704183

**Authors:**

Dr Rajesh Rajendran, Christopher Kerry and Dr Gerry Rayman on behalf of the MaGIC study group

Dr Rajesh Rajendran, Research Fellow, Diabetes Centre, The Ipswich Hospital NHS Trust, Heath Road, Ipswich, IP4 5PD, UK

Christopher Kerry, Diabetes Specialist Nurse, Diabetes Centre, The Ipswich Hospital NHS Trust, Heath Road, Ipswich, UK, IP4 5PD, UK

Dr Gerry Rayman, Consultant Physician, Diabetes Centre, The Ipswich Hospital NHS Trust, Heath Road, Ipswich, IP4 5PD, UK

**Key words:**

Insulin

Sulphonylureas

Inpatient diabetes

Hypoglycaemia

Blood glucose

**Word Count:**

Abstract: 274, Manuscript content: 2883, Tables: 2, Figures: 2

**Abstract:**

Objectives: To determine whether temporal patterns of hypoglycaemia exist in inpatients with diabetes 'at risk' of hypoglycaemia (those on insulin and/or sulphonylureas), and if so whether patterns differ between hospitals and between these treatments.

Setting: Retrospective multicentre audit of inpatients with diabetes involving 11 acute UK NHS Trusts.

Participants: Capillary blood glucose readings of 3.9mmol/l or less (hypoglycaemia) for all inpatients with diabetes 'at risk' of hypoglycaemia were extracted from Abbott Precision Web Point-of-Care Data Management System™ over a four-week period. Overall 2,521 readings of 3.9mmol/l or less (hypoglycaemia) occurring in 866 subjects between 01/06/2013 and 29/06/2013 were analysed.

Interventions: Not applicable

Primary and secondary outcome measures: Not applicable

Results: The majority (65%) occurred between 21:00-08:59 hours, a pattern common to all Trusts. This was more frequent in sulphonylurea than insulin treated subjects (75.3% vs 59.3%,  $p=0.0001$ ). Furthermore, hypoglycaemic readings were more frequent between 05:00-07:59 hours in sulphonylurea than insulin treated subjects (46.7% vs 22.7% of readings for respective treatments,  $p=0.0001$ ). Sulphonylureas accounted for 31.8% of all hypoglycaemic readings. As a group, sulphonylurea treated subjects were older (median age 78 vs 73 years,  $p=0.0001$ ) and had lower HbA1c [median 56mmol/mol (7.3%) vs 69mmol/mol (8.5%),  $p=0.0001$ ]. Hypoglycaemic readings per subject were as frequent for sulphonylurea as for insulin treated subjects (median=2 for both) as were the proportion in each group with  $\geq 5$  readings (17.3% vs 17.7%).

Conclusions: In all Trusts hypoglycaemic readings were more frequent between 21:00-08:59 hours in 'at risk' inpatients with diabetes, with a greater frequency in the early morning period (05:00-07:59 hours) in sulphonylurea treated inpatients. This may have implications for the continuing use of sulphonylureas in the inpatient setting.

Trial registration: Not applicable.

**Article summary:****Strengths and limitations of this study:**

1. This study reports the burden of sulphonylurea related inpatient hypoglycaemia in NHS Trusts which has not been previously documented.
2. This study reports that the risk of hypoglycaemia appears to be greater in sulphonylurea treated inpatients than insulin treated inpatients in early morning hours.
3. This study confirms a previous single centre report that hypoglycaemia occurs more commonly at night-time/early morning in NHS Trusts participating in this study.
4. One of the limitations of this study was the inability to obtain the total number of inpatients with diabetes, type of diabetes and proportion of inpatients treated with insulin and sulphonylureas who did not experience hypoglycaemia.
5. Another limitation was that the detection of hypoglycaemic readings was strongly influenced by glucose monitoring frequency which was pre-determined.

**Introduction:**

Until recently tight glycaemic control in inpatients has been considered to be important in reducing morbidity and mortality as previous studies have shown that inpatient hyperglycaemia is associated with poorer outcomes (1, 2). However its advantages are offset by the risk of hypoglycaemia. Although the available data does not conclusively suggest that inpatient hypoglycaemia is an independent risk factor for mortality per se, there is increasing evidence that it is associated with increased mortality, morbidity and length of stay (3-5). In the NICE-SUGAR multinational randomised control trial severe hypoglycaemia was thirteen times more frequent in the intensively treated group (6.8% vs 0.5%,  $p < 0.001$ ) in which there was found to be a significantly higher ninety-day mortality compared to the conventional group (6). Subsequently, a meta-analysis that included the NICE-SUGAR data concluded that tight glycaemic control (with insulin therapy) increased the risk of hypoglycaemia with no overall mortality benefit (7). Indeed, some have suggested that hypoglycaemia should now be considered a new factor for cardiovascular risk (8).

The burden of inpatient hypoglycaemia in NHS hospitals has been well highlighted by the annual National Diabetes Inpatient Audit (NaDIA), the largest one week snapshot audit covering >95% of all acute NHS Trusts in England and Wales. In 2012, NaDIA reported that in England alone, 22.4% of inpatients experienced at least one hypoglycaemic episode [capillary blood glucose (CBG)  $\leq 3.9$ mmol/l] and 2.2% had at least one hypoglycaemic episode that required rescue injectable therapy (9). Hypoglycaemia was significantly higher in those on insulin therapy; 45.3% of patients with type 1 diabetes and 31.8% of patients with type 2 diabetes treated with insulin had at least one episode of hypoglycaemia (9).

The American Diabetes Association (ADA) recommendation that insulin therapy in the form of a basal bolus regimen should be used as the preferred method of achieving and maintaining glycaemic control for all inpatients with diabetes has been widely adopted in the US (10). In the UK, there is no national consensus on the type of therapy that should be used for managing inpatients with diabetes who had not previously been on insulin i.e. whether oral agents be continued or there be a temporary switch to insulin therapy. Reluctance to adopt the ADA recommendation is supported by the frequency of drug errors and hypoglycaemia associated with insulin use from NaDIA data (9). However, to date, the extent of inpatient hypoglycaemia in the UK from the use of oral agents that can precipitate hypoglycaemia, namely sulphonylurea therapy is unknown.

1  
2  
3  
4  
5  
6  
7  
8  
9  
10  
11  
12  
13  
14  
15  
16  
17  
18  
19  
20  
21  
22  
23  
24  
25  
26  
27  
28  
29  
30  
31  
32  
33  
34  
35  
36  
37  
38  
39  
40  
41  
42  
43  
44  
45  
46  
47  
48  
49  
50  
51  
52  
53  
54  
55  
56  
57  
58  
59  
60

In a recent study of inpatient hypoglycaemia in one NHS hospital, we found that more than two-thirds of all hypoglycaemic readings occurred between 21:00-08:59 hours (11). The current study was designed to determine whether similar or other temporal patterns of hypoglycaemia exist in other NHS hospitals and if so, to consider the possible reasons for any observed differences and potential preventative strategies. Additionally, in the previous study there appeared to be more hypoglycaemic readings in those on sulphonylurea therapy than anticipated, but that study was not specifically designed to examine this (11). As a result of this anecdotal observation and in view of the ADA's abandonment of sulphonylurea therapy in the inpatient setting, the current study was also designed to compare hypoglycaemic rates and patterns in sulphonylurea and insulin treated inpatients.

### Methods:

The Joint British Diabetes Society (JBDS) recommends all adults with blood glucose  $\leq 3.9$ mmol/l in hospitals be treated whether or not they are symptomatic (12). We therefore defined hypoglycaemia in our inpatient cohort as CBG  $\leq 3.9$ mmol/l irrespective of the presence or absence of symptoms. Severe hypoglycaemia is usually defined as an episode of hypoglycaemia requiring third party assistance. This definition is not applicable to inpatients as most patients will not have direct access to carbohydrates and therefore require third party assistance from a health care professional even if the event was mild. We therefore used NaDIA 2012's biochemical classification of hypoglycaemia in which mild hypoglycaemia is defined as a CBG 3-3.9mmol/l and severe hypoglycaemia as a CBG  $\leq 2.9$ mmol/l, irrespective of symptoms and necessity for third party assistance (9). Although not strictly correct, for the purpose of this study, we defined night-time hypoglycaemia as that between 21:00-08:59 hours and daytime hypoglycaemia as that between 09:00-20:59 hours.

The study was a four week retrospective multi-centre audit, undertaken between 01/06/13 and 29/06/13 in 11 NHS Trusts. Institutional approval was obtained from the audit department of each individual NHS Trust. All Trusts used Precision Xceed Pro<sup>TM</sup> as the only CBG monitoring system across the entire hospital. All CBG readings were relayed remotely to Precision Web Point-of-Care Data Management System<sup>TM</sup> (Abbott Diabetes Care Inc., Alameda, CA 94502, USA). From this database, all CBG readings of  $\leq 3.9$ mmol/l were extracted at each NHS site including patients' unique identifiers, ward location, date and time of measurement. Each CBG reading of  $\leq 3.9$ mmol/l was considered as an episode but

1  
2  
3 recurrent readings of  $\leq 3.9$  mmol/l within 2 hours of a previously documented hypoglycaemic  
4 episode were automatically excluded as they could reflect re-testing for the same event.  
5  
6

7  
8 We included adult ( $\geq 18$  years) inpatients with diabetes 'at risk' of hypoglycaemia i.e. those  
9 treated with insulin and/or sulphonylureas. Data from Accident and Emergency departments,  
10 paediatric and day case areas were excluded. Age, length of stay until 15/07/13, type of  
11 therapy and HbA1c (within the preceding 3 months) data were collected. Hospital bed  
12 numbers (excluding maternity and the previously mentioned areas) and factors that could  
13 influence institutional hypoglycaemia rates such as average weekly hours spent by diabetes  
14 specialist staff on inpatient diabetes care, meal timings, bedtime snack availability and  
15 frequency of CBG monitoring were obtained.  
16  
17  
18  
19  
20  
21

#### 22 23 Statistics:

24 After completion of data collection, unique patient identifiers were removed and results were  
25 analysed using Microsoft Excel 2007, GraphPad and IBM SPSS Statistics v20. Descriptive  
26 statistics were used to evaluate characteristics of study subjects. Unpaired t test was used to  
27 compare means in parametric continuous data and Wilcoxon-Mann-Whitney test to compare  
28 non-parametric continuous data. Fisher's exact test was used to compare categorical data.  
29 Pearson correlation was used to evaluate linear correlation. All p values are two tailed and  
30  $< 0.05$  was considered statistically significant.  
31  
32  
33  
34  
35  
36  
37

#### 38 Results:

39 Overall, 2,521 hypoglycaemic readings in 866 subjects from 11 NHS Trusts were analysed  
40 (Tables 1 and 2). Hypoglycaemia was exclusively attributable to sulphonylureas in 32.7% of  
41 all subjects who had recorded hypoglycaemia and accounted for 31.8% of all hypoglycaemic  
42 readings. In subjects exclusively treated with sulphonylurea therapy, 22.5% of readings were  
43 severe as opposed to 35.9% in insulin treated subjects. There was no difference in the  
44 percentage of subjects experiencing  $\geq 5$  hypoglycaemic readings between those treated with  
45 sulphonylureas and those on insulin therapy (17.3% vs 17.7%,  $p=0.923$ ). Additionally, the  
46 number of hypoglycaemic readings per subject was the same for sulphonylurea and insulin  
47 treated subjects (median= 2 for both,  $p=0.888$ ). Length of stay was similar between the two  
48 groups (median 11 vs 10 days,  $p=0.098$ ). Subjects on sulphonylureas were significantly older  
49 (median age 78 vs 73 years,  $p=0.0001$ ) and had lower HbA1c [median 56 mmol/mol (7.3%)  
50 vs 69 mmol/mol (8.5%),  $p=0.0001$ ]. Length of stay correlated significantly with the number  
51  
52  
53  
54  
55  
56  
57  
58  
59  
60

1  
2  
3 of hypoglycaemic readings per subject for both insulin ( $r=0.286$ ,  $p=0.0001$ ) and  
4 sulphonylurea ( $r=0.167$ ,  $p=0.005$ ) treated subjects but did not correlate with age and HbA1c.  
5  
6

7  
8 Temporal pattern analysis showed that hypoglycaemic readings were most frequent between  
9 05:00-07:59 hours. Not surprisingly, the other frequent times coincided with glucose  
10 monitoring times i.e. before lunch, evening meal and bedtime. Interestingly, a significant  
11 number of hypoglycaemic readings occurred between 02:00-02:59 hours in all Trusts (even  
12 though routine 3am glucose monitoring was performed only by Trust 2). The observed  
13 patterns were similar in all Trusts (Figure 1). The relative frequency of hypoglycaemic  
14 readings between 05:00-07:59 hours in sulphonylurea treated subjects was twice that of the  
15 insulin treated subjects (46.7% vs 22.7%,  $p=0.0001$ ), despite similar glucose monitoring  
16 frequency for both therapies (Figure 2). Overall, 65% of all hypoglycaemic readings occurred  
17 at night-time, ranging from 54.1% to 72.2% across the 11 Trusts. This was significantly  
18 greater in sulphonylurea compared to insulin treated subjects (75.3% vs 59.3%,  $p=0.0001$ ).  
19 There was a positive correlation between proportion of night-time to daytime hypoglycaemic  
20 readings and proportion of hypoglycaemic readings attributable to sulphonylureas for each  
21 Trust ( $r=0.787$ ,  $p=0.004$ ). There was no significant difference in the number of  
22 hypoglycaemic readings per day between weekdays and weekends [mean (SD)  $88.15\pm 16.95$   
23 vs  $84.22\pm 12.16$ ,  $p=0.538$ ]. There was no relationship between the time reported to be spent  
24 by diabetes specialist nurses on inpatient care and hypoglycaemic readings per 100 bed ratio  
25 ( $r=-0.342$ ,  $p=0.303$ ).  
26  
27  
28  
29  
30  
31  
32  
33  
34  
35  
36  
37  
38  
39

#### 40 **Discussion:**

41 Having expected to find variations in temporal patterns of hypoglycaemic readings related to  
42 differing clinical practices we found that all Trusts demonstrated the same pattern of  
43 hypoglycaemia as seen in the index hospital (11). We had previously postulated that  
44 prolonged fasting (14 hours) between evening meal and breakfast as well as the lack of  
45 bedtime carbohydrate snacks in the index hospital as important contributory factors. It is  
46 therefore of interest that all Trusts in this study reported similar prolonged fasting (13.5-15.5  
47 hours) after the evening meal and that none guaranteed the provision of bedtime carbohydrate  
48 snacks. This feeding practice appears to be common in UK hospitals as reported in our  
49 previous online survey of NHS Trusts (11). We believe that addressing these meal timings  
50 and provision of bedtime carbohydrate snacks could reduce the frequency of hypoglycaemia  
51 in UK hospitals.  
52  
53  
54  
55  
56  
57  
58  
59  
60



1  
2  
3  
4  
5  
6  
7  
8  
9  
10  
11  
12  
13  
14  
15  
16  
17  
18  
19  
20  
21  
22  
23  
24  
25  
26  
27  
28  
29  
30  
31  
32  
33  
34  
35  
36  
37  
38  
39  
40  
41  
42  
43  
44  
45  
46  
47  
48  
49  
50  
51  
52  
53  
54  
55  
56  
57  
58  
59  
60

The second important finding was the extent of inpatient hypoglycaemia related to the use of sulphonylurea therapy. Whilst the burden of sulphonylurea related hypoglycaemia needing emergency medical assistance is increasingly recognised in the community setting (13-15), its contribution to inpatient hypoglycaemia appears not to have been fully appreciated. In this study we found that one third of hypoglycaemic readings were related to sulphonylurea therapy and indeed the frequency of inpatients experiencing markedly recurrent hypoglycaemia ( $\geq 5$  hypoglycaemic readings) was the same as those receiving insulin. In a recent single centre report from one of the few US hospitals where oral agents continue to be used in the management of inpatient diabetes, one in five patients treated with sulphonylureas experienced at least one hypoglycaemic episode during their inpatient stay (16). In our study it was not possible to determine this as the initial source data was hypoglycaemic readings recorded in the Precision Web Point-of-Care Data Management System<sup>TM</sup> and therefore the total number of inpatients with diabetes was not known.

There are a number of factors that may contribute to frequent hypoglycaemia in inpatients on sulphonylurea therapy. Health care professionals have greater concern for insulin treated inpatients than those on tablets who are often considered to have less severe diabetes and therefore perceived less likely to suffer hypoglycaemia. Physicians, nurses and even the small subgroup of patients who self-manage their diabetes in hospital are less inclined to adjust doses of oral hypoglycaemic agents than insulin even during periods of varying meal intake. This is reflected in the TOPDOC study of UK trainee-doctors, who when given an example of a patient with poor control, were less likely to alter the dose of oral agents compared to insulin (65% vs 79%) (17). Finally, the pharmacokinetic profile of sulphonylureas are less predictable compared to insulin especially in the complex inpatient setting with changing nutritional status, renal function etc.

In the US, insulin therapy is the preferred treatment for all inpatients with diabetes (10). The basal-bolus system, utilising well tested insulin regimens such as the RABBIT medical and surgical protocols are extensively used and have been shown to be associated with low frequencies of inpatient hypoglycaemia (18, 19). It is unlikely that such regimens will be adopted in the UK in the near future as this would require transferring up to one in six inpatients with diabetes to basal-bolus insulin therapy, when at present the expertise for initiating and monitoring inpatients on insulin therapy is very limited. Thus, NaDIA 2012

1  
2  
3 found that 32.2% of NHS England Trusts did not have a dedicated diabetes inpatient  
4 specialist nurse (9). Secondly, very serious concerns have been raised on the safe use of  
5 insulin in inpatients in UK (20-22). The National Patient Safety Agency identified 16,600  
6 reported incidents involving insulin between November 2003 and November 2009, the  
7 majority occurring in inpatients; 24% caused harm to the patient and there were 18 individual  
8 incidences associated with fatal or severe outcomes (22). Importantly these figures represent  
9 the tip of the iceberg as it is recognised that such errors are grossly under-reported in the UK.  
10 Thus, in contrast, NaDIA 2012 found that in England 21.8% of inpatients with diabetes  
11 treated with insulin therapy in the week of the audit had one or more insulin errors,  
12 summing to one hundred and fifty thousand errors each year (9). Furthermore, in a recent  
13 retrospective survey of diabetes inpatient teams at least twelve episodes of serious harm  
14 related to inpatient hypoglycaemia (including death, cardiac arrest and irreversible brain  
15 injury) were reported to have occurred in the 41 UK Trusts who participated in the survey  
16 covering a twelve month period. Insulin therapy was implicated in at least ten of these events  
17 (in press). It is hoped that in the future electronic prescribing and clinical decision support  
18 systems will help to minimise these errors while recognising that such systems are not  
19 infallible and will not prevent errors in insulin administration nor in management decisions  
20 (23, 24).  
21  
22  
23  
24  
25  
26  
27  
28  
29  
30  
31  
32  
33

34 Finally, one of the aims of this multi-site study was to identify and learn from differences  
35 between Trusts. Trust 2 had the lowest frequency of both mild and severe hypoglycaemia per  
36 100 beds and the lowest number of recurrent hypoglycaemic readings. It may be relevant that  
37 this Trust introduced a number of changes in practice to reduce their institutional  
38 hypoglycaemia rates following a fatal adverse event related to inpatient hypoglycaemia.  
39 These included intentionally relaxing inpatient glycaemic targets to 7-11mmol/l in  
40 comparison with the currently recommended acceptable range of 4-12mmol/l (25),  
41 introducing an aggressive capillary glucose monitoring regimen including 3am glucose  
42 testing (the only trust to do so) and implementing intensive education programs for nursing  
43 and medical staff achieved by increasing the number of inpatient diabetes specialist nurses  
44 and their time devoted to inpatient care (Table 1). Whether replicating these practices in other  
45 Trusts would lead to reductions in their institutional hypoglycaemia rates can only be  
46 speculated.  
47  
48  
49  
50  
51  
52  
53  
54  
55  
56  
57  
58  
59  
60

1  
2  
3 We recognise several limitations to our study. The source data was the Precision Web Point-  
4 of-Care Data Management System<sup>TM</sup>; as a result we were unable to obtain the total number of  
5 inpatients with diabetes, a breakdown by type of diabetes, and the proportions treated with  
6 insulin and sulphonylureas who did not experience hypoglycaemia. Therefore, we were  
7 unable to calculate the exact risk with each therapy per se. The detection of hypoglycaemic  
8 readings was strongly influenced by glucose monitoring frequency which was pre-determined  
9 and similar in all hospitals; occurring at meal times and bedtime. Continuous glucose  
10 monitoring would almost certainly reveal an even greater frequency of hypoglycaemic  
11 readings, especially at night-time when patients are not routinely monitored. As previously  
12 mentioned while hospital meal times may be a major contributory factor for the frequency of  
13 night-time and early morning hypoglycaemia, we acknowledge that we did not consider other  
14 important factors for hypoglycaemia in hospitalised patients such as sepsis, renal and liver  
15 disease, overall nutritional status and changing drug therapies such as tapering of steroid  
16 therapy. Despite these limitations we believe that this study provides important information  
17 on institutional patterns of inpatient hypoglycaemia in the 'at risk' inpatients and the impact  
18 of sulphonylurea therapies.  
19  
20  
21  
22  
23  
24  
25  
26  
27  
28  
29  
30

31 In summary in UK hospitals, hypoglycaemia is detected more frequently during the period  
32 between 21:00-08:59 hours (night-time), and sulphonylurea therapy appears to present a  
33 greater risk than insulin particularly between 05:00-07:59 hours (early morning). Institutional  
34 feeding patterns appear to be contributory but further work is required to determine whether a  
35 change in meal times would reduce institutional hypoglycaemia rates. Importantly, our  
36 findings may have implications for the continued use of sulphonylureas in the UK in the  
37 inpatient setting.  
38  
39  
40  
41  
42  
43  
44

#### 45 **What is already known on this topic?**

46 A single NHS Trust previously reported that hypoglycaemia was more frequent at night-time  
47 in hospitalised patients.  
48

49 It was not known whether this pattern was common in other NHS Trusts.

50 The burden of inpatient hypoglycaemia due to sulphonylurea therapy was not previously  
51 known in NHS Trusts.  
52  
53  
54  
55  
56  
57  
58  
59  
60

**What this study adds:**

Hypoglycaemia is detected more commonly at night-time/early morning in all participating NHS Trusts.

Similar problems with institutional feeding patterns exist in all participating NHS Trusts.

There is a substantial burden of sulphonylurea related inpatient hypoglycaemia and it appears to present a greater risk than insulin therapy in early morning hours.

These observations should lead to a review of feeding times and the use of sulphonylureas in hospitalised patients.

**Figure legends:**

Figure 1: Temporal patterns of hypoglycaemic readings over the 24 hour period in the individual 11 NHS Trusts. The x axis represent the time period, for e.g. 0 represents the time period between 00:00 and 00:59 hours, 1 represents the time period between 01:00 and 01:59 hours etc. The y axis represents the number of hypoglycaemic readings occurring in that time period. The figure demonstrates very similar temporal patterns for all Trusts.

Figure 2: Temporal patterns of hypoglycaemic readings over the 24 hour period in all subjects on insulin, sulphonylureas and both. The x axis represent the time period, for e.g. 0 represents the time period between 00:00 and 00:59 hours, 1 represents the time period between 01:00 and 01:59 hours etc. The y axis represents the number of hypoglycaemic readings occurring in that time period. The figure demonstrates that the highest frequency occurs between 05:00 to 07:59 hours for both insulin and sulphonylurea therapies. .

Table 1: Table represents individual data from the 11 NHS Trusts.

Table 2: Table shows combined data from all Trusts for subjects on insulin, sulphonylureas or both forms of therapy.

**Copyright/licence for publication statement:**

The Corresponding Author has the right to grant on behalf of all authors and does grant on behalf of all authors, a worldwide licence to the Publishers and its licensees in perpetuity, in all forms, formats and media (whether known now or created in the future), to i) publish, reproduce, distribute, display and store the Contribution, ii) translate the Contribution into other languages, create adaptations, reprints, include within collections and create summaries,

1  
2  
3 extracts and/or, abstracts of the Contribution, iii) create any other derivative work(s) based on  
4 the Contribution, iv) to exploit all subsidiary rights in the Contribution, v) the inclusion of  
5 electronic links from the Contribution to third party material where-ever it may be located;  
6 and, vi) licence any third party to do any or all of the above.  
7  
8  
9

10  
11 **Declaration of competing interests:**  
12

13 All three authors have completed the ICMJE uniform disclosure form at  
14 [www.icmje.org/coi\\_disclosure.pdf](http://www.icmje.org/coi_disclosure.pdf) and declare: the MaGIC study group meetings were  
15 sponsored by Abbott, UK who also assisted in extraction of data from Precision Web Point-  
16 of-Care Data Management System<sup>TM</sup> but was not involved in the design or origin of the  
17 study, nor in funding or influencing the analysis, nor in interpretation or reporting of the data  
18 nor in the preparation of this manuscript; no financial relationships with any organisations  
19 that might have an interest in the submitted work in the previous three years; no other  
20 relationships or activities that could appear to have influenced the submitted work.  
21  
22  
23  
24  
25  
26  
27

28 **Transparency declaration statement:**  
29

30 The lead author RR (the manuscript's guarantor) affirms that the manuscript is an honest,  
31 accurate, and transparent account of the study being reported; that no important aspects of the  
32 study have been omitted; and that any discrepancies from the study as planned have been  
33 explained.  
34  
35  
36  
37

38 **Data sharing statement:**  
39

40 Additional data is available by emailing the corresponding author Dr Gerry Rayman-  
41 [gerry.rayman@ipswichhospital.nhs.uk](mailto:gerry.rayman@ipswichhospital.nhs.uk)  
42  
43  
44

45 **Contributorship and authorship statement:**  
46

47 RR designed data collection tools, monitored data collection, cleaned and analysed the data,  
48 drafted and revised the paper. He is the guarantor. CK assisted in data collection and revised  
49 the draft paper. GR initiated the audit, monitored data collection, drafted and revised the  
50 paper and was the lead for the audit. All other members of MaGIC study group designed the  
51 audit, assisted in data collection and revised the draft paper. The following are members of  
52 the MaGIC (Managing Glycaemia using Innovations in Care) study group (UK): Gerry  
53 Rayman (Group lead, The Ipswich Hospital NHS Trust), Rajesh Rajendran (The Ipswich  
54 Hospital NHS Trust), Chris Kerry (The Ipswich Hospital NHS Trust), Ainslie Lang (Royal  
55  
56  
57  
58  
59  
60

1  
2  
3 United Hospital Bath NHS Trust), James Young (Worcestershire Acute Hospitals NHS  
4 Trust), Lisa Smith (Worcestershire Acute Hospitals NHS Trust), Jane Wilson (Worcestershire  
5 Acute Hospitals NHS Trust), Erwin Castro (East Essex Healthcare NHS Trust), Valerie  
6 Edwards (East Essex Healthcare NHS Trust), Fathi Abourawi (Northern Lincolnshire and  
7 Goole Hospitals NHS Foundation Trust), Caroline Andrews (Northern Lincolnshire and  
8 Goole Hospitals NHS Foundation Trust), Francesca Swords (Norfolk and Norwich  
9 University Hospitals NHS Foundation Trust), Michelle Nation (The Royal Bournemouth and  
10 Christchurch Hospitals NHS Foundation Trust), Beverley Eaglesfield (Derby Hospitals NHS  
11 Foundation Trust), Anne Lee (Derby Hospitals NHS Foundation Trust), Kim Heathcote  
12 (NHS Dumfries and Galloway), Fiona Green (NHS Dumfries and Galloway), Louise Clark  
13 (NHS Dumfries and Galloway), Jenny Tringham (Frimley Park Hospital NHS Foundation  
14 Trust), Laura Dinning (Harrogate and District NHS Foundation Trust) and Peter Hammond  
15 (Harrogate and District NHS Foundation Trust).  
16  
17  
18  
19  
20  
21  
22  
23  
24  
25

#### 26 **References:**

- 27 1. Krinsley JS. Association between hyperglycemia and increased hospital mortality in a  
28 heterogeneous population of critically ill patients. Mayo Clinic proceedings Mayo Clinic.  
29 2003; 78(12):1471-8  
30  
31  
32
- 33 2. Umpierrez GE, Isaacs SD, Bazargan N, You X, Thaler LM, Kitabchi AE. Hyperglycemia:  
34 an independent marker of in-hospital mortality in patients with undiagnosed diabetes. The  
35 Journal of clinical endocrinology and metabolism. 2002;87(3):978-82.  
36  
37  
38  
39
- 40 3. Hypoglycaemia is associated with increased length of stay and mortality in people with  
41 diabetes who are hospitalized. Nirantharakumar K, Marshall T, Kennedy A, Narendran P,  
42 Hemming K, Coleman JJ. Diabet Med. 2012; 29(12):e445-8.  
43  
44  
45  
46
- 47 4. Hypoglycemia as a predictor of mortality in hospitalized elderly patients. Kagansky N,  
48 Levy S, Rimon E, et al. Arch Intern Med. 2003; 163(15):1825-9.  
49  
50  
51  
52
- 53 5. Hypoglycemia and clinical outcomes in patients with diabetes hospitalized in the general  
54 ward. Turchin A, Matheny ME, Shubina M, Scanlon JV, Greenwood B, Pendergrass ML.  
55 Diabetes Care. 2009; 32(7):1153-7.  
56  
57  
58  
59  
60

- 1  
2  
3 6. Intensive versus conventional glucose control in critically ill patients. NICE-SUGAR  
4 Study Investigators, Finfer S, Chittock DR, Su SY, et al. N Engl J Med. 2009; 360(13):1283-  
5 97.  
6  
7
- 8  
9  
10 7. Intensive insulin therapy and mortality among critically ill patients: a meta-analysis  
11 including NICE-SUGAR study data. Griesdale DE, de Souza RJ, van Dam RM, et al. CMAJ.  
12 2009; 180(8):821-7.  
13
- 14  
15  
16 8. Intensive glucose control and hypoglycaemia: a new cardiovascular risk factor? Rana OA,  
17 Byrne CD, Greaves K. Heart. 2013 May 22; [Epub ahead of print]  
18  
19
- 20  
21 9. National Diabetes Inpatient Audit (NaDIA) - 2012. Available at  
22 <http://www.hscic.gov.uk/catalogue/PUB10506>. Last accessed 04/10/2013.  
23  
24
- 25  
26 10. Standards of medical care in diabetes-2013. American Diabetes Association. Diabetes  
27 Care. 2013; 36 Suppl 1:S11-66.  
28  
29
- 30  
31 11. Diurnal temporal patterns of hypoglycaemia in hospitalized people with diabetes may  
32 reveal potentially correctable factors. Kerry C, Mitchell S, Sharma S, Scott A, Rayman G.  
33 Diabet Med. 2013 30(12):1403-1406.  
34  
35
- 36  
37  
38 12. The hospital management of hypoglycaemia in adults with diabetes mellitus. Joint British  
39 Diabetes Society Guideline. Available at <http://www.diabetologists-abcd.org.uk/JBDS/JBDS.htm>.  
40 Last accessed 25-01-2014.  
41  
42
- 43  
44  
45 13. Hypoglycemia requiring ambulance services in patients with type 2 diabetes is associated  
46 with increased long-term mortality. Parsaik AK, Carter RE, Myers LA, Basu A, Kudva YC.  
47 Endocr Pract. 2013; 19(1):29-35.  
48  
49
- 50  
51 14. Sulphonyurea as a cause of severe hypoglycaemia in the community. Ng JM, Mellor DD,  
52 Masson EA, Allan BJ. Prim Care Diabetes. 2010; 4(1):61-3.  
53  
54
- 55  
56 15. Characteristics of patients with sulphonurea-induced hypoglycemia. Schejter YD, Turvall  
57 E, Ackerman Z. J Am Med Dir Assoc. 2012; 13(3):234-8.  
58  
59  
60

- 1  
2  
3  
4  
5 16. Hypoglycemia in hospitalized patients treated with sulfonylureas. Deussenberry CM,  
6 Coley KC, Korytkowski MT, Donihi AC. *Pharmacotherapy* 2012; 32(7): 613-7.  
7  
8
- 9  
10 17. Lack of confidence among trainee doctors in the management of diabetes: the Trainees  
11 Own Perception of Delivery of Care (TOPDOC) Diabetes Study. George JT, Warriner D,  
12 McGrane DJ, et al; TOPDOC Diabetes Study Team. *QJM*. 2011; 104(9):761-6.  
13  
14
- 15  
16 18. Randomized study of basal-bolus insulin therapy in the inpatient management of patients  
17 with type 2 diabetes (RABBIT 2 trial). Umpierrez GE, Smiley D, Zisman A, et al. *Diabetes*  
18 *Care*. 2007; 30(9):2181-6.  
19  
20
- 21  
22 19. Randomized study of basal-bolus insulin therapy in the inpatient management of patients  
23 with type 2 diabetes undergoing general surgery (RABBIT 2 surgery). Umpierrez GE, Smiley  
24 D, Jacobs S, et al. *Diabetes Care*. 2011; 34(2):256-61.  
25  
26
- 27  
28 20. Safer administration of insulin: summary of a safety report from the National Patient  
29 Safety Agency. Lamont T, Cousins D, Hillson R, Bischler A, Terblanche M. *BMJ*. 2010;  
30 341:c5269.  
31  
32
- 33  
34 21. Prescribing errors in diabetes. Cox RA, Ferner ER. *Br J Diabetes Vasc Dis* 2009; 9:84–88  
35  
36
- 37  
38 22. Insulin, hospitals and harm: a review of patient safety incidents reported to the National  
39 Patient Safety Agency. Cousins D, Rosario C, Scarpello J. *Clin Med*. 2011; 11(1):28-30.  
40  
41
- 42  
43 23. E-prescribing: clinical implications for patients with diabetes. Smith M, Dang D, Lee J.  
44 *J Diabetes Sci Technol*. 2009; 3(5):1215-8.  
45  
46
- 47  
48 24. Clinical decision support systems in the care of inpatients with diabetes in non-critical  
49 care setting: systematic review. Nirantharakumar K, Chen YF, Marshall T, Webber J,  
50 Coleman JJ. *Diabet Med*. 2012; 29(6):698-708.  
51  
52  
53  
54  
55  
56  
57  
58  
59  
60



1  
2  
3 25. NHS Diabetes guideline for the perioperative management of the adult patient with  
4 diabetes. Dhatariya K, Levy N, Kilvert A, et al; Joint British Diabetes Societies. Diabet Med.  
5 2012; 29(4):420-33.  
6  
7  
8  
9  
10  
11  
12  
13  
14  
15  
16  
17  
18  
19  
20  
21  
22  
23  
24  
25  
26  
27  
28  
29  
30  
31  
32  
33  
34  
35  
36  
37  
38  
39  
40  
41  
42  
43  
44  
45  
46  
47  
48  
49  
50  
51  
52  
53  
54  
55  
56  
57  
58  
59  
60

Table 1:

| Variable                                                                                              | Each individual Trust data |        |             |             |       |             |             |             |             |             |             | Combined data across all Trusts |      |
|-------------------------------------------------------------------------------------------------------|----------------------------|--------|-------------|-------------|-------|-------------|-------------|-------------|-------------|-------------|-------------|---------------------------------|------|
|                                                                                                       | 1                          | 2      | 3           | 4           | 5     | 6           | 7           | 8           | 9           | 10          | 11          |                                 |      |
| Number of beds*                                                                                       | 537                        | 690    | 344         | 264         | 449   | 939         | 680         | 997         | 274         | 690         | 293         | 6157                            |      |
| Diabetes Inpatient Specialist Nurse time devoted to inpatient diabetes care†                          | 75.5                       | 97     | 30          | 20          | 20    | 78          | 75          | 52          | 10          | 32          | 48.5        | 538                             |      |
| Number of 'at risk' subjects                                                                          | All                        | 85     | 82          | 40          | 43    | 67          | 156         | 73          | 155         | 50          | 74          | 41                              | 866  |
|                                                                                                       | Insulin                    | 50     | 56          | 26          | 18    | 39          | 103         | 44          | 96          | 29          | 52          | 28                              | 541  |
|                                                                                                       | Sulphonylurea              | 32     | 25          | 12          | 22    | 24          | 44          | 22          | 52          | 18          | 20          | 12                              | 283  |
|                                                                                                       | Both‡                      | 3      | 1           | 2           | 3     | 4           | 9           | 7           | 7           | 3           | 2           | 1                               | 42   |
| Number of hypoglycaemic readings                                                                      | All                        | 334    | 163         | 136         | 115   | 264         | 432         | 234         | 316         | 159         | 198         | 170                             | 2521 |
|                                                                                                       | Insulin                    | 219    | 107         | 90          | 61    | 161         | 257         | 161         | 199         | 96          | 118         | 125                             | 1594 |
|                                                                                                       | Sulphonylurea              | 105    | 55          | 34          | 51    | 89          | 154         | 61          | 104         | 46          | 68          | 34                              | 801  |
|                                                                                                       | Both‡                      | 10     | 1           | 12          | 3     | 14          | 21          | 12          | 13          | 17          | 12          | 11                              | 126  |
|                                                                                                       | Mild hypoglycaemia         | 239    | 124         | 86          | 81    | 177         | 309         | 165         | 203         | 103         | 134         | 108                             | 1729 |
| Severe hypoglycaemia                                                                                  | 95                         | 39     | 50          | 34          | 87    | 123         | 69          | 113         | 56          | 64          | 62          | 792                             |      |
| Hypoglycaemia per 100 bed ratio§                                                                      | All                        | 62.2   | 23.6        | 39.5        | 43.6  | 58.8        | 46          | 34.4        | 31.7        | 58          | 28.7        | 58                              | 41   |
|                                                                                                       | Mild hypoglycaemia         | 44.5   | 18          | 25          | 30.7  | 39.4        | 32.9        | 24.3        | 20.4        | 37.6        | 19.4        | 36.9                            | 28.1 |
|                                                                                                       | Severe hypoglycaemia       | 17.7   | 5.6         | 14.5        | 12.9  | 19.4        | 13.1        | 10.1        | 11.3        | 20.4        | 9.3         | 21.1                            | 12.9 |
| Hypoglycaemic readings per subject                                                                    | Median                     | 2      | 1           | 2           | 2     | 3           | 2           | 2           | 2           | 2           | 1           | 2                               | 2    |
|                                                                                                       | Mean                       | 3.93   | 1.99        | 3.4         | 2.7   | 3.94        | 2.77        | 3.21        | 2.04        | 3.18        | 2.68        | 4.15                            | 2.91 |
|                                                                                                       | Range                      | 1-29   | 1-9         | 1-11        | 1-23  | 1-18        | 1-16        | 1-13        | 1-11        | 1-12        | 1-14        | 1-30                            | 1-30 |
| Subjects with ≥5 readings of hypoglycaemia during the study period                                    | 20                         | 7      | 10          | 5           | 18    | 27          | 15          | 15          | 11          | 15          | 11          | 154                             |      |
| Frequency of glucose monitoring                                                                       | Insulin                    | BD-QDS | QDS and 3am | QDS         | QDS   | BD-QDS      | QDS         | QDS         | QDS         | QDS         | QDS         | QDS                             | -    |
|                                                                                                       | Sulphonylurea              | BD-QDS | QDS and 3am | BD-QDS      | BD    | BD-QDS      | BD-QDS      | QDS         | BD-QDS      | QDS         | OD-QDS      | QDS                             | -    |
| Hospital meal timings                                                                                 | Breakfast                  | 7:30   | 7:00        | 7:00-8:00   | 8:30  | 7:30-8:30   | 7:00-9:00   | 7:30-8:30   | 7:45-8:30   | 7:45-8:30   | 7:00-8:00   | 8:00                            | -    |
|                                                                                                       | Afternoon meal             | 12:00  | 12:00       | 12:00-13:00 | 12:15 | 12:00-13:00 | 12:00-14:00 | 11:30-12:45 | 12:00-13:00 | 12:00-13:00 | 12:00-13:00 | 12:00                           | -    |
|                                                                                                       | Evening meal               | 17:00  | 17:00       | 18:00-19:00 | 17:00 | 17:00-18:00 | 17:00-19:00 | 16:30-17:45 | 17:00-18:00 | 17:00-18:00 | 17:00-18:00 | 17:00                           | -    |
| <b>Time period of hypoglycaemic readings</b>                                                          |                            |        |             |             |       |             |             |             |             |             |             |                                 |      |
| Daytime                                                                                               | 09:00-14:59                | 75     | 30          | 25          | 8     | 33          | 61          | 45          | 46          | 25          | 14          | 31                              | 393  |
|                                                                                                       | 15:00-20:59                | 50     | 33          | 29          | 25    | 51          | 78          | 46          | 65          | 24          | 41          | 47                              | 489  |
| 09:00-20:59                                                                                           |                            | 125    | 63          | 54          | 33    | 84          | 139         | 91          | 111         | 49          | 55          | 78                              | 882  |
| Night-time                                                                                            | 21:00-02:59                | 93     | 36          | 36          | 34    | 69          | 133         | 68          | 76          | 45          | 51          | 45                              | 686  |
|                                                                                                       | 03:00-08:59                | 116    | 64          | 46          | 48    | 111         | 160         | 75          | 129         | 65          | 92          | 47                              | 953  |
|                                                                                                       | 21:00-08:59                | 209    | 100         | 82          | 82    | 180         | 293         | 143         | 205         | 110         | 143         | 92                              | 1639 |
| Percentage of night-time hypoglycaemia                                                                | 62.6                       | 61.3   | 60.3        | 71.3        | 68.2  | 67.8        | 61.1        | 64.9        | 69.2        | 72.2        | 54.1        | 65                              |      |
| *Bed numbers exclude paediatric, maternity and day case units                                         |                            |        |             |             |       |             |             |             |             |             |             |                                 |      |
| †Average Diabetes Inpatient Specialist Nurse time (hours per week) devoted to inpatient diabetes care |                            |        |             |             |       |             |             |             |             |             |             |                                 |      |
| ‡Subjects on both insulin and sulphonylurea therapy                                                   |                            |        |             |             |       |             |             |             |             |             |             |                                 |      |
| §Calculated as 100 * number of hypoglycaemic readings ÷ number of beds                                |                            |        |             |             |       |             |             |             |             |             |             |                                 |      |
| No Trust guaranteed the provision of a bedtime snack for inpatients with diabetes                     |                            |        |             |             |       |             |             |             |             |             |             |                                 |      |

Table 2:

| Variable                                                                                 | All                          | Insulin                                  | Sulphonyl urea                           | Both Insulin and Sulphonylureas          |                                         |
|------------------------------------------------------------------------------------------|------------------------------|------------------------------------------|------------------------------------------|------------------------------------------|-----------------------------------------|
| Number of subjects                                                                       | 866                          | 541                                      | 283                                      | 42                                       |                                         |
| Number of hypoglycaemic readings (%)                                                     | All                          | 2521                                     | 1594                                     | 801                                      | 126                                     |
|                                                                                          | Severe hypoglycaemia         | 792 (31.4)                               | 572 (35.9)                               | 180 (22.5)                               | 40 (31.7)                               |
|                                                                                          | Mild hypoglycaemia           | 1729 (68.6)                              | 1022 (64.1)                              | 621 (77.5)                               | 86 (68.3)                               |
| Subjects with $\geq 5$ readings of hypoglycaemia per subject during the study period (%) | 154 (17.8)                   | 96 (17.7)                                | 49 (17.3)                                | 9 (21.4)                                 |                                         |
|                                                                                          |                              | p=0.923                                  |                                          |                                          |                                         |
| Number of hypoglycaemic readings per subject                                             | Mean $\pm$ SD (Range)        | 2.91 $\pm$ 3.16 (1-30)                   | 2.95 $\pm$ 3.29 (1-30)                   | 2.83 $\pm$ 2.89 (1-29)                   | 3 $\pm$ 3.21 (1-12)                     |
|                                                                                          | Median (Interquartile range) | 2 (1-3)                                  | 2 (1-3)                                  | 2 (1-4)                                  | 1 (1-3.25)                              |
|                                                                                          |                              | p=0.888                                  |                                          |                                          |                                         |
| Age (years)                                                                              | Mean $\pm$ SD (Range)        | 71 $\pm$ 16 (18-98)                      | 67 $\pm$ 18 (18-97)                      | 76 $\pm$ 10 (42-98)                      | 75 $\pm$ 9 (46-91)                      |
|                                                                                          | Median (Interquartile range) | 75 (64-82)                               | 73 (56-81)                               | 78 (70-83)                               | 77 (69-81)                              |
|                                                                                          |                              | p=0.0001                                 |                                          |                                          |                                         |
| HbA1c in mmol/mol (%)                                                                    | Mean [Range]                 | n=575*<br>69(8.5)<br>[28(4.7)-177(18.3)] | n=364*<br>73(8.8)<br>[28(4.7)-177(18.3)] | n=181*<br>60(7.6)<br>[33(5.2)-161(16.9)] | n=30*<br>73(8.8)<br>[46(6.4)-115(12.7)] |
|                                                                                          | Median [Interquartile range] | 64(8)<br>[53(7)-80(9.5)]                 | 69(8.5)<br>[56(7.3)-83(9.7)]             | 56(7.3)<br>(47(6.5)-66(8.2))             | 73(8.8)<br>[55(7.2)-86(10)]             |
|                                                                                          |                              | p=0.0001                                 |                                          |                                          |                                         |
| Length of stay (days)                                                                    | Mean $\pm$ SD (Range)        | n=862*<br>17 $\pm$ 17.1 (1-101)          | n=540*<br>16.1 $\pm$ 17 (1-101)          | n=282*<br>17 $\pm$ 16.2 (1-100)          | n=40*<br>25 $\pm$ 21.9 (1-82)           |
|                                                                                          | Median (Interquartile range) | 11 (5-22)                                | 10 (4-21)                                | 11 (6-23)                                | 20 (7-45)                               |
|                                                                                          |                              | p=0.098                                  |                                          |                                          |                                         |
| <b>Temporal pattern of hypoglycaemic readings</b>                                        |                              |                                          |                                          |                                          |                                         |
| Daytime hypoglycaemia                                                                    | 09:00-14:59                  | 393                                      | 296                                      | 84                                       | 13                                      |
|                                                                                          | 15:00-20:59                  | 489                                      | 352                                      | 114                                      | 23                                      |
|                                                                                          | Total 09:00-20:59            | 882                                      | 648                                      | 198                                      | 36                                      |
| Night-time hypoglycaemia (%)                                                             | 21:00-02:59                  | 686                                      | 478                                      | 179                                      | 29                                      |
|                                                                                          | 03:00-08:59                  | 953                                      | 468                                      | 424                                      | 61                                      |
|                                                                                          | Total 21:00-08:59            | 1639 (65)                                | 946 (59.3)                               | 603 (75.3)                               | 90 (71.4)                               |
|                                                                                          |                              | p=0.0001                                 |                                          |                                          |                                         |
| *Subjects in whom data available                                                         |                              |                                          |                                          |                                          |                                         |

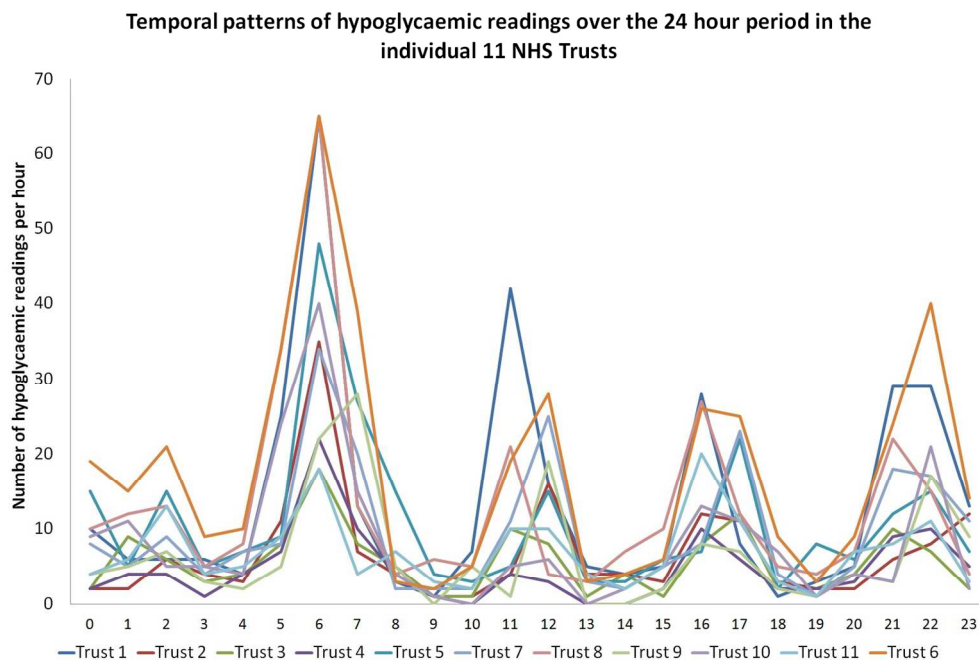

Temporal patterns of hypoglycaemic readings over the 24 hour period in the individual 11 NHS Trusts. The x axis represent the time period, for e.g. 0 represents the time period between 00:00 and 00:59 hours, 1 represents the time period between 01:00 and 01:59 hours etc. The y axis represents the number of hypoglycaemic readings occurring in that time period. The figure demonstrates very similar temporal patterns for all Trusts.  
446x300mm (96 x 96 DPI)

Temporal pattern of hypoglycaemic readings over the 24 hour period in all subjects on insulin, sulphonylureas and both

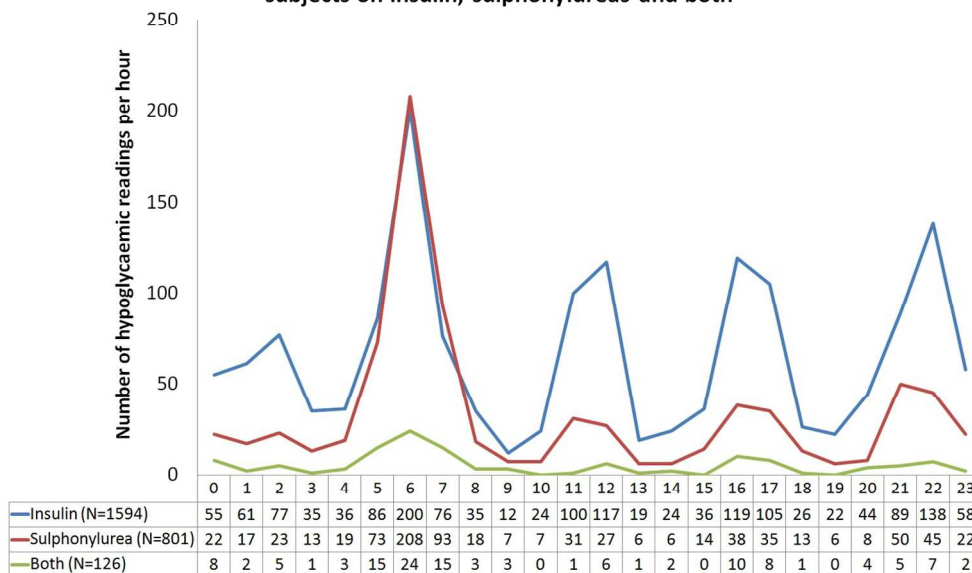

Temporal patterns of hypoglycaemic readings over the 24 hour period in all subjects on insulin, sulphonylureas and both. The x axis represent the time period, for e.g. 0 represents the time period between 00:00 and 00:59 hours, 1 represents the time period between 01:00 and 01:59 hours etc. The y axis represents the number of hypoglycaemic readings occurring in that time period. The figure demonstrates that the highest frequency occurs between 05:00 to 07:59 hours for both insulin and sulphonylurea therapies.

398x259mm (96 x 96 DPI)

# BMJ Open

## Temporal patterns of hypoglycaemia and burden of sulphonylurea related hypoglycaemia in UK hospitals: a retrospective multi-centre audit of hospitalised patients with diabetes

|                                 |                                                                                                                                                                               |
|---------------------------------|-------------------------------------------------------------------------------------------------------------------------------------------------------------------------------|
| Journal:                        | <i>BMJ Open</i>                                                                                                                                                               |
| Manuscript ID:                  | bmjopen-2014-005165.R1                                                                                                                                                        |
| Article Type:                   | Research                                                                                                                                                                      |
| Date Submitted by the Author:   | 09-Jun-2014                                                                                                                                                                   |
| Complete List of Authors:       | Rajendran, Rajesh; Ipswich Hospital, The Diabetes Centre<br>Kerry, Christopher; Ipswich Hospital, The Diabetes Centre<br>Rayman, Gerry; Ipswich Hospital, The Diabetes Centre |
| <b>Primary Subject Heading</b>: | Diabetes and endocrinology                                                                                                                                                    |
| Secondary Subject Heading:      | Diabetes and endocrinology                                                                                                                                                    |
| Keywords:                       | DIABETES & ENDOCRINOLOGY, General diabetes < DIABETES & ENDOCRINOLOGY, INTERNAL MEDICINE, Diabetes & endocrinology < INTERNAL MEDICINE                                        |
|                                 |                                                                                                                                                                               |

SCHOLARONE™  
Manuscripts

**Original article:****Title:**

Temporal patterns of hypoglycaemia and burden of sulphonylurea related hypoglycaemia in UK hospitals: a retrospective multi-centre audit of hospitalised patients with diabetes

**Correspondence to:**

Dr Gerry Rayman

Diabetes Centre, The Ipswich Hospital NHS Trust, Heath Road, Ipswich, IP4 5PD, UK

Email: [gerry.rayman@ipswichhospital.nhs.uk](mailto:gerry.rayman@ipswichhospital.nhs.uk)

Phone: 00441473704193

Fax: 00441473704183

**Authors:**

Dr Rajesh Rajendran, Christopher Kerry and Dr Gerry Rayman on behalf of the MaGIC study group

Dr Rajesh Rajendran, Research Fellow, Diabetes Centre, The Ipswich Hospital NHS Trust, Heath Road, Ipswich, IP4 5PD, UK

Christopher Kerry, Diabetes Specialist Nurse, Diabetes Centre, The Ipswich Hospital NHS Trust, Heath Road, Ipswich, UK, IP4 5PD, UK

Dr Gerry Rayman, Consultant Physician, Diabetes Centre, The Ipswich Hospital NHS Trust, Heath Road, Ipswich, IP4 5PD, UK

**Key words:**

Insulin

Sulphonylureas

Inpatient diabetes

Hypoglycaemia

Blood glucose

**Word Count:**

Abstract: 274, Manuscript content: 2883, Tables: 2, Figures: 2

**Abstract:**

Objectives: To determine whether temporal patterns of hypoglycaemia exist in inpatients with diabetes 'at risk' of hypoglycaemia (those on insulin and/or sulphonylureas), and if so whether patterns differ between hospitals and between these treatments.

Setting: Retrospective multicentre audit of inpatients with diabetes involving 11 acute UK NHS Trusts.

Participants: Capillary blood glucose readings of 3.9mmol/l or less (hypoglycaemia) for all inpatients with diabetes 'at risk' of hypoglycaemia were extracted from Abbott Precision Web Point-of-Care Data Management System™ over a four-week period. Overall 2,521 readings of 3.9mmol/l or less (hypoglycaemia) occurring in 866 subjects between 01/06/2013 and 29/06/2013 were analysed.

Interventions: Not applicable

Primary and secondary outcome measures: Not applicable

Results: The majority (65%) occurred between 21:00-08:59 hours, a pattern common to all Trusts. This was more frequent in sulphonylurea than insulin treated subjects (75.3% vs 59.3%,  $p=0.0001$ ). Furthermore, hypoglycaemic readings were more frequent between 05:00-07:59 hours in sulphonylurea than insulin treated subjects (46.7% vs 22.7% of readings for respective treatments,  $p=0.0001$ ). Sulphonylureas accounted for 31.8% of all hypoglycaemic readings. As a group, sulphonylurea treated subjects were older (median age 78 vs 73 years,  $p=0.0001$ ) and had lower HbA1c [median 56mmol/mol (7.3%) vs 69mmol/mol (8.5%),  $p=0.0001$ ]. Hypoglycaemic readings per subject were as frequent for sulphonylurea as for insulin treated subjects (median=2 for both) as were the proportion in each group with  $\geq 5$  readings (17.3% vs 17.7%).

Conclusions: In all Trusts hypoglycaemic readings were more frequent between 21:00-08:59 hours in 'at risk' inpatients with diabetes, with a greater frequency in the early morning period (05:00-07:59 hours) in sulphonylurea treated inpatients. This may have implications for the continuing use of sulphonylureas in the inpatient setting.

Trial registration: Not applicable.



**Article summary:****Strengths and limitations of this study:**

1. This study reports the burden of sulphonylurea related inpatient hypoglycaemia in NHS Trusts which has not been previously documented.
2. This study reports that the risk of hypoglycaemia appears to be greater in sulphonylurea treated inpatients than insulin treated inpatients in early morning hours.
3. This study confirms a previous single centre report that hypoglycaemia occurs more commonly at night-time/early morning in NHS Trusts participating in this study.
4. One of the limitations of this study was the inability to obtain the total number of inpatients with diabetes, type of diabetes and proportion of inpatients treated with insulin and sulphonylureas who did not experience hypoglycaemia.
5. Another limitation was that the detection of hypoglycaemic readings was strongly influenced by glucose monitoring frequency which was pre-determined.

**Introduction:**

Until recently tight glycaemic control in inpatients has been considered to be important in reducing morbidity and mortality as previous studies have shown that inpatient hyperglycaemia is associated with poorer outcomes (1, 2). However its advantages are offset by the risk of hypoglycaemia. Although the available data does not conclusively suggest that inpatient hypoglycaemia is an independent risk factor for mortality per se, there is increasing evidence that it is associated with increased mortality, morbidity and length of stay (3-5). In the NICE-SUGAR multinational randomised control trial severe hypoglycaemia was thirteen times more frequent in the intensively treated group (6.8% vs 0.5%,  $p < 0.001$ ) in which there was found to be a significantly higher ninety-day mortality compared to the conventional group (6). Subsequently, a meta-analysis that included the NICE-SUGAR data concluded that tight glycaemic control (with insulin therapy) increased the risk of hypoglycaemia with no overall mortality benefit (7). Indeed, some have suggested that hypoglycaemia should now be considered a new factor for cardiovascular risk (8).

The burden of inpatient hypoglycaemia in NHS hospitals has been well highlighted by the annual National Diabetes Inpatient Audit (NaDIA), the largest one week snapshot audit covering >95% of all acute NHS Trusts in England and Wales. In 2012, NaDIA reported that in England alone, 22.4% of inpatients experienced at least one hypoglycaemic episode [capillary blood glucose (CBG)  $\leq 3.9$ mmol/l] and 2.2% had at least one hypoglycaemic episode that required rescue injectable therapy (9). Hypoglycaemia was significantly higher in those on insulin therapy; 45.3% of patients with type 1 diabetes and 31.8% of patients with type 2 diabetes treated with insulin had at least one episode of hypoglycaemia (9).

The American Diabetes Association (ADA) recommendation that insulin therapy in the form of a basal bolus regimen should be used as the preferred method of achieving and maintaining glycaemic control for all inpatients with diabetes has been widely adopted in the US (10). In the UK, there is no national consensus on the type of therapy that should be used for managing inpatients with diabetes who had not previously been on insulin i.e. whether oral agents be continued or there be a temporary switch to insulin therapy. Reluctance to adopt the ADA recommendation is supported by the frequency of drug errors and hypoglycaemia associated with insulin use from NaDIA data (9). However, to date, the extent of inpatient hypoglycaemia in the UK from the use of oral agents that can precipitate hypoglycaemia, namely sulphonylurea therapy is unknown.

1  
2  
3  
4  
5  
6  
7  
8  
9  
10  
11  
12  
13  
14  
15  
16  
17  
18  
19  
20  
21  
22  
23  
24  
25  
26  
27  
28  
29  
30  
31  
32  
33  
34  
35  
36  
37  
38  
39  
40  
41  
42  
43  
44  
45  
46  
47  
48  
49  
50  
51  
52  
53  
54  
55  
56  
57  
58  
59  
60

In a recent study of inpatient hypoglycaemia in one NHS hospital, we found that more than two-thirds of all hypoglycaemic readings occurred between 21:00-08:59 hours (11). The current study was designed to determine whether similar or other temporal patterns of hypoglycaemia exist in other NHS hospitals and if so, to consider the possible reasons for any observed differences and potential preventative strategies. Additionally, in the previous study there appeared to be more hypoglycaemic readings in those on sulphonylurea therapy than anticipated, but that study was not specifically designed to examine this (11). As a result of this anecdotal observation and in view of the ADA's abandonment of sulphonylurea therapy in the inpatient setting, the current study was also designed to compare hypoglycaemic rates and patterns in sulphonylurea and insulin treated inpatients.

### Methods:

The Joint British Diabetes Society (JBDS) recommends all adults with blood glucose  $\leq 3.9$ mmol/l in hospitals be treated whether or not they are symptomatic (12). We therefore defined hypoglycaemia in our inpatient cohort as CBG  $\leq 3.9$ mmol/l irrespective of the presence or absence of symptoms. Severe hypoglycaemia is usually defined as an episode of hypoglycaemia requiring third party assistance. This definition is not applicable to inpatients as most patients will not have direct access to carbohydrates and therefore require third party assistance from a health care professional even if the event was mild. We therefore used NaDIA 2012's biochemical classification of hypoglycaemia in which mild hypoglycaemia is defined as a CBG 3-3.9mmol/l and severe hypoglycaemia as a CBG  $\leq 2.9$ mmol/l, irrespective of symptoms and necessity for third party assistance (9). Although not strictly correct, for the purpose of this study, we defined night-time hypoglycaemia as that between 21:00-08:59 hours and daytime hypoglycaemia as that between 09:00-20:59 hours.

The study was a four week retrospective multi-centre audit, undertaken between 01/06/13 and 29/06/13 in 11 NHS Trusts. Institutional approval was obtained from the audit department of each individual NHS Trust. All Trusts used Precision Xceed Pro<sup>TM</sup> as the only CBG monitoring system across the entire hospital. All CBG readings were relayed remotely to Precision Web Point-of-Care Data Management System<sup>TM</sup> (Abbott Diabetes Care Inc., Alameda, CA 94502, USA). From this database, all CBG readings of  $\leq 3.9$ mmol/l were extracted at each NHS site including patients' unique identifiers, ward location, date and time of measurement. Each CBG reading of  $\leq 3.9$ mmol/l was considered as an episode but

1  
2  
3 recurrent readings of  $\leq 3.9$ mmol/l within 2 hours of a previously documented hypoglycaemic  
4 episode were automatically excluded as they could reflect re-testing for the same event.  
5  
6

7  
8 We included adult ( $\geq 18$  years) inpatients with diabetes 'at risk' of hypoglycaemia i.e. those  
9 treated with insulin and/or sulphonylureas. Data from Accident and Emergency departments,  
10 paediatric and day case areas were excluded. Age, length of stay until 15/07/13, type of  
11 therapy and HbA1c (within the preceding 3 months) data were collected from retrospective  
12 review of case records. Hospital bed numbers (excluding maternity and the previously  
13 mentioned areas) and factors that could influence institutional hypoglycaemia rates such as  
14 average weekly hours spent by diabetes specialist staff on inpatient diabetes care, meal  
15 timings, bedtime snack availability and frequency of CBG monitoring were obtained.  
16  
17  
18  
19  
20  
21

#### 22 Statistics:

23  
24 After completion of data collection, unique patient identifiers were removed and results were  
25 analysed using Microsoft Excel 2007, GraphPad and IBM SPSS Statistics v20. Descriptive  
26 statistics were used to evaluate characteristics of study subjects. Unpaired t test was used to  
27 compare means in parametric continuous data and Wilcoxon-Mann-Whitney test to compare  
28 non-parametric continuous data. Fisher's exact test was used to compare categorical data.  
29 Pearson correlation was used to evaluate linear correlation. All p values are two tailed and  
30  $< 0.05$  was considered statistically significant.  
31  
32  
33  
34  
35  
36  
37

#### 38 Results:

39  
40 Overall, 2,521 hypoglycaemic readings in 866 subjects from 11 NHS Trusts were analysed  
41 (Tables 1 and 2). Hypoglycaemia was exclusively attributable to sulphonylureas in 32.7% of  
42 all subjects who had recorded hypoglycaemia and accounted for 31.8% of all hypoglycaemic  
43 readings. In subjects exclusively treated with sulphonylurea therapy, 22.5% of readings were  
44 severe as opposed to 35.9% in insulin treated subjects. There was no difference in the  
45 percentage of subjects experiencing  $\geq 5$  hypoglycaemic readings between those treated with  
46 sulphonylureas and those on insulin therapy (17.3% vs 17.7%,  $p=0.923$ ). Additionally, the  
47 number of hypoglycaemic readings per subject was the same for sulphonylurea and insulin  
48 treated subjects (median= 2 for both,  $p=0.888$ ). Length of stay was similar between the two  
49 groups (median 11 vs 10 days,  $p=0.098$ ). Subjects on sulphonylureas were significantly older  
50 (median age 78 vs 73 years,  $p=0.0001$ ) and had lower HbA1c [median 56mmol/mol (7.3%)  
51 vs 69mmol/mol (8.5%),  $p=0.0001$ ]. Length of stay correlated significantly with the number  
52  
53  
54  
55  
56  
57  
58  
59  
60

1  
2  
3 of hypoglycaemic readings per subject for both insulin ( $r=0.286$ ,  $p=0.0001$ ) and  
4 sulphonylurea ( $r=0.167$ ,  $p=0.005$ ) treated subjects but did not correlate with age and HbA1c.  
5  
6

7  
8 Temporal pattern analysis showed that hypoglycaemic readings were most frequent between  
9 05:00-07:59 hours. Not surprisingly, the other frequent times coincided with glucose  
10 monitoring times i.e. before lunch, evening meal and bedtime. Interestingly, a significant  
11 number of hypoglycaemic readings occurred between 02:00-02:59 hours in all Trusts (even  
12 though routine 3am glucose monitoring was performed only by Trust 2). The observed  
13 patterns were similar in all Trusts (Figure 1). The relative frequency of hypoglycaemic  
14 readings between 05:00-07:59 hours in sulphonylurea treated subjects was twice that of the  
15 insulin treated subjects (46.7% vs 22.7%,  $p=0.0001$ ), despite similar glucose monitoring  
16 frequency for both therapies (Figure 2). Overall, 65% of all hypoglycaemic readings occurred  
17 at night-time, ranging from 54.1% to 72.2% across the 11 Trusts. This was significantly  
18 greater in sulphonylurea compared to insulin treated subjects (75.3% vs 59.3%,  $p=0.0001$ ).  
19 There was a positive correlation between proportion of night-time to daytime hypoglycaemic  
20 readings and proportion of hypoglycaemic readings attributable to sulphonylureas for each  
21 Trust ( $r=0.787$ ,  $p=0.004$ ). There was no significant difference in the number of  
22 hypoglycaemic readings per day between weekdays and weekends [mean (SD)  $88.15\pm 16.95$   
23 vs  $84.22\pm 12.16$ ,  $p=0.538$ ]. There was no relationship between the time reported to be spent  
24 by diabetes specialist nurses on inpatient care and hypoglycaemic readings per 100 bed ratio  
25 ( $r=-0.342$ ,  $p=0.303$ ).  
26  
27  
28  
29  
30  
31  
32  
33  
34  
35  
36  
37  
38  
39

#### 40 **Discussion:**

41 Having expected to find variations in temporal patterns of hypoglycaemic readings related to  
42 differing clinical practices we found that all Trusts demonstrated the same pattern of  
43 hypoglycaemia as seen in the index hospital (11). We had previously postulated that  
44 prolonged fasting (14 hours) between evening meal and breakfast as well as the lack of  
45 bedtime carbohydrate snacks in the index hospital as important contributory factors. It is  
46 therefore of interest that all Trusts in this study reported similar prolonged fasting (13.5-15.5  
47 hours) after the evening meal and that none guaranteed the provision of bedtime carbohydrate  
48 snacks. This feeding practice appears to be common in UK hospitals as reported in our  
49 previous online survey of NHS Trusts (11). We believe that addressing these meal timings  
50 and provision of bedtime carbohydrate snacks could reduce the frequency of hypoglycaemia  
51 in UK hospitals.  
52  
53  
54  
55  
56  
57  
58  
59  
60

1  
2  
3  
4  
5  
6  
7  
8  
9  
10  
11  
12  
13  
14  
15  
16  
17  
18  
19  
20  
21  
22  
23  
24  
25  
26  
27  
28  
29  
30  
31  
32  
33  
34  
35  
36  
37  
38  
39  
40  
41  
42  
43  
44  
45  
46  
47  
48  
49  
50  
51  
52  
53  
54  
55  
56  
57  
58  
59  
60

The second important finding was the extent of inpatient hypoglycaemia related to the use of sulphonylurea therapy. Whilst the burden of sulphonylurea related hypoglycaemia needing emergency medical assistance is increasingly recognised in the community setting (13-15), its contribution to inpatient hypoglycaemia appears not to have been fully appreciated. In this study we found that one third of hypoglycaemic readings were related to sulphonylurea therapy and indeed the frequency of inpatients experiencing markedly recurrent hypoglycaemia ( $\geq 5$  hypoglycaemic readings) was the same as those receiving insulin. In a recent single centre report from one of the few US hospitals where oral agents continue to be used in the management of inpatient diabetes, one in five patients treated with sulphonylureas experienced at least one hypoglycaemic episode during their inpatient stay (16). In our study it was not possible to determine this as the initial source data was hypoglycaemic readings recorded in the Precision Web Point-of-Care Data Management System<sup>TM</sup> and therefore the total number of inpatients with diabetes was not known. In addition, for the same reason, it was not possible to determine whether those with low eGFR had more hypoglycaemia, nor whether different insulin regimes were associated with greater risk.

There are a number of factors that may contribute to frequent hypoglycaemia in inpatients on sulphonylurea therapy. Health care professionals have greater concern for insulin treated inpatients than those on tablets who are often considered to have less severe diabetes and therefore perceived less likely to suffer hypoglycaemia. Physicians, nurses and even the small subgroup of patients who self-manage their diabetes in hospital are less inclined to adjust doses of oral hypoglycaemic agents than insulin even during periods of varying meal intake. This is reflected in the TOPDOC study of UK trainee-doctors, who when given an example of a patient with poor control, were less likely to alter the dose of oral agents compared to insulin (65% vs 79%) (17). Finally, the pharmacokinetic profile of sulphonylureas are less predictable compared to insulin especially in the complex inpatient setting with changing nutritional status, renal function etc.

In the US, insulin therapy is the preferred treatment for all inpatients with diabetes (10). The basal-bolus system, utilising well tested insulin regimens such as the RABBIT medical and surgical protocols are extensively used and have been shown to be associated with low frequencies of inpatient hypoglycaemia (18, 19). It is unlikely that such regimens will be adopted in the UK in the near future as this would require transferring up to one in six

1  
2  
3 inpatients with diabetes to basal-bolus insulin therapy, when at present the expertise for  
4 initiating and monitoring inpatients on insulin therapy is very limited. Thus, NaDIA 2012  
5 found that 32.2% of NHS England Trusts did not have a dedicated diabetes inpatient  
6 specialist nurse (9). Secondly, very serious concerns have been raised on the safe use of  
7 insulin in inpatients in UK (20-22). The National Patient Safety Agency identified 16,600  
8 reported incidents involving insulin between November 2003 and November 2009, the  
9 majority occurring in inpatients; 24% caused harm to the patient and there were 18 individual  
10 incidences associated with fatal or severe outcomes (22). Importantly these figures represent  
11 the tip of the iceberg as it is recognised that such errors are grossly under-reported in the UK.  
12 Thus, in contrast, NaDIA 2012 found that in England 21.8% of inpatients with diabetes  
13 treated with insulin therapy in the week of the audit had one or more insulin errors,  
14 summing to one hundred and fifty thousand errors each year (9). Furthermore, in a recent  
15 retrospective survey of diabetes inpatient teams at least twelve episodes of serious harm  
16 related to inpatient hypoglycaemia (including death, cardiac arrest and irreversible brain  
17 injury) were reported to have occurred in the 41 UK Trusts who participated in the survey  
18 covering a twelve month period. Insulin therapy was implicated in at least ten of these events  
19 (23). It is hoped that in the future electronic prescribing and clinical decision support systems  
20 will help to minimise these errors while recognising that such systems are not infallible and  
21 will not prevent errors in insulin administration nor in management decisions (24, 25).  
22  
23  
24  
25  
26  
27  
28  
29  
30  
31  
32  
33  
34  
35

36 Finally, one of the aims of this multi-site study was to identify and learn from differences  
37 between Trusts. Trust 2 had the lowest frequency of both mild and severe hypoglycaemia per  
38 100 beds and the lowest number of recurrent hypoglycaemic readings. It may be relevant that  
39 this Trust introduced a number of changes in practice to reduce their institutional  
40 hypoglycaemia rates following a fatal adverse event related to inpatient hypoglycaemia.  
41 These included intentionally relaxing inpatient glycaemic targets to 7-11mmol/l in  
42 comparison with the currently recommended acceptable range of 4-12mmol/l (26),  
43 introducing an aggressive capillary glucose monitoring regimen including 3am glucose  
44 testing (the only trust to do so) and implementing intensive education programs for nursing  
45 and medical staff achieved by increasing the number of inpatient diabetes specialist nurses  
46 and their time devoted to inpatient care (Table 1). Whether replicating these practices in other  
47 Trusts would lead to reductions in their institutional hypoglycaemia rates can only be  
48 speculated.  
49  
50  
51  
52  
53  
54  
55  
56  
57  
58  
59  
60

1  
2  
3 We recognise several limitations to our study. The source data was the Precision Web Point-  
4 of-Care Data Management System<sup>TM</sup>; as a result we were unable to obtain the total number of  
5 inpatients with diabetes, a breakdown by type of diabetes, and the proportions treated with  
6 insulin and sulphonylureas who did not experience hypoglycaemia. Therefore, we were  
7 unable to calculate the exact risk with each therapy per se. The detection of hypoglycaemic  
8 readings was strongly influenced by glucose monitoring frequency which was pre-determined  
9 and similar in all hospitals; occurring at meal times and bedtime. Continuous glucose  
10 monitoring would almost certainly reveal an even greater frequency of hypoglycaemic  
11 readings, especially at night-time when patients are not routinely monitored. As previously  
12 mentioned while hospital meal times may be a major contributory factor for the frequency of  
13 night-time and early morning hypoglycaemia, we acknowledge that we did not consider other  
14 important factors for hypoglycaemia in hospitalised patients such as sepsis, renal and liver  
15 disease, overall nutritional status and changing drug therapies such as tapering of steroid  
16 therapy. Despite these limitations we believe that this study provides important information  
17 on institutional patterns of inpatient hypoglycaemia in the 'at risk' inpatients and the impact  
18 of sulphonylurea therapies.  
19  
20  
21  
22  
23  
24  
25  
26  
27  
28  
29  
30

31 In summary in UK hospitals, hypoglycaemia is detected more frequently during the period  
32 between 21:00-08:59 hours (night-time), and sulphonylurea therapy appears to present a  
33 greater risk than insulin particularly between 05:00-07:59 hours (early morning). Institutional  
34 feeding patterns appear to be contributory but further work is required to determine whether a  
35 change in meal times would reduce institutional hypoglycaemia rates. Importantly, our  
36 findings may have implications for the continued use of sulphonylureas in the UK in the  
37 inpatient setting.  
38  
39  
40  
41  
42  
43  
44

#### 45 **What is already known on this topic?**

46 A single NHS Trust previously reported that hypoglycaemia was more frequent at night-time  
47 in hospitalised patients.  
48

49 It was not known whether this pattern was common in other NHS Trusts.

50 The burden of inpatient hypoglycaemia due to sulphonylurea therapy was not previously  
51 known in NHS Trusts.  
52  
53  
54  
55  
56  
57  
58  
59  
60



**What this study adds:**

Hypoglycaemia is detected more commonly at night-time/early morning in all participating NHS Trusts.

Similar problems with institutional feeding patterns exist in all participating NHS Trusts.

There is a substantial burden of sulphonylurea related inpatient hypoglycaemia and it appears to present a greater risk than insulin therapy in early morning hours.

These observations should lead to a review of feeding times and the use of sulphonylureas in hospitalised patients.

**Figure legends:**

Figure 1: Temporal patterns of hypoglycaemic readings over the 24 hour period in the individual 11 NHS Trusts. The x axis represent the time period, for e.g. 0 represents the time period between 00:00 and 00:59 hours, 1 represents the time period between 01:00 and 01:59 hours etc. The y axis represents the number of hypoglycaemic readings occurring in that time period. The figure demonstrates very similar temporal patterns for all Trusts.

Figure 2: Temporal patterns of hypoglycaemic readings over the 24 hour period in all subjects on insulin, sulphonylureas and both. The x axis represent the time period, for e.g. 0 represents the time period between 00:00 and 00:59 hours, 1 represents the time period between 01:00 and 01:59 hours etc. The y axis represents the number of hypoglycaemic readings occurring in that time period. The figure demonstrates that the highest frequency occurs between 05:00 to 07:59 hours for both insulin and sulphonylurea therapies. .

Table 1: Table represents individual data from the 11 NHS Trusts.

Table 2: Table shows combined data from all Trusts for subjects on insulin, sulphonylureas or both forms of therapy.

**Copyright/licence for publication statement:**

The Corresponding Author has the right to grant on behalf of all authors and does grant on behalf of all authors, a worldwide licence to the Publishers and its licensees in perpetuity, in all forms, formats and media (whether known now or created in the future), to i) publish, reproduce, distribute, display and store the Contribution, ii) translate the Contribution into other languages, create adaptations, reprints, include within collections and create summaries,

1  
2  
3 extracts and/or, abstracts of the Contribution, iii) create any other derivative work(s) based on  
4 the Contribution, iv) to exploit all subsidiary rights in the Contribution, v) the inclusion of  
5 electronic links from the Contribution to third party material where-ever it may be located;  
6 and, vi) licence any third party to do any or all of the above.  
7  
8  
9

### 11 **Declaration of competing interests:**

12 All three authors have completed the ICMJE uniform disclosure form at  
13 [www.icmje.org/coi\\_disclosure.pdf](http://www.icmje.org/coi_disclosure.pdf) and declare: the MaGIC study group meetings were  
14 sponsored by Abbott, UK who also assisted in extraction of data from Precision Web Point-  
15 of-Care Data Management System<sup>TM</sup> but was not involved in the design or origin of the  
16 study, nor in funding or influencing the analysis, nor in interpretation or reporting of the data  
17 nor in the preparation of this manuscript; no financial relationships with any organisations  
18 that might have an interest in the submitted work in the previous three years; no other  
19 relationships or activities that could appear to have influenced the submitted work.  
20  
21  
22  
23  
24  
25  
26  
27

### 28 **Transparency declaration statement:**

29 The lead author RR (the manuscript's guarantor) affirms that the manuscript is an honest,  
30 accurate, and transparent account of the study being reported; that no important aspects of the  
31 study have been omitted; and that any discrepancies from the study as planned have been  
32 explained.  
33  
34  
35  
36  
37

### 38 **Data sharing statement:**

39 No additional data is available.  
40  
41  
42

### 43 **Contributorship**

44 RR designed data collection tools, monitored data collection, cleaned and analysed the data,  
45 drafted and revised the paper. He is the guarantor. CK assisted in data collection and revised  
46 the draft paper. GR initiated the audit, monitored data collection, drafted and revised the  
47 paper and was the lead for the audit.  
48  
49  
50  
51  
52

### 53 **Collaborators**

54 All other members of MaGIC study group designed the audit, assisted in data collection and  
55 revised the draft paper. The following are members of the MaGIC (Managing Glycaemia  
56 using Innovations in Care) study group (UK): Gerry Rayman (Group lead, The Ipswich  
57  
58  
59  
60

1  
2  
3 Hospital NHS Trust), Rajesh Rajendran (The Ipswich Hospital NHS Trust), Chris Kerry (The  
4 Ipswich Hospital NHS Trust), Ainslie Lang (Royal United Hospital Bath NHS Trust), James  
5 Young (Worcestershire Acute Hospitals NHS Trust), Lisa Smith (Worcestershire Acute  
6 Hospitals NHS Trust), Jane Wilson (Worcestershire Acute Hospitals NHS Trust), Erwin  
7 Castro (East Essex Healthcare NHS Trust), Valerie Edwards (East Essex Healthcare NHS  
8 Trust), Fathi Abourawi (Northern Lincolnshire and Goole Hospitals NHS Foundation Trust),  
9 Caroline Andrews (Northern Lincolnshire and Goole Hospitals NHS Foundation Trust),  
10 Francesca Swords (Norfolk and Norwich University Hospitals NHS Foundation Trust),  
11 Michelle Nation (The Royal Bournemouth and Christchurch Hospitals NHS Foundation  
12 Trust), Beverley Eaglesfield (Derby Hospitals NHS Foundation Trust), Anne Lee (Derby  
13 Hospitals NHS Foundation Trust), Kim Heathcote (NHS Dumfries and Galloway), Fiona  
14 Green (NHS Dumfries and Galloway), Louise Clark (NHS Dumfries and Galloway), Jenny  
15 Tringham (Frimley Park Hospital NHS Foundation Trust), Laura Dinning (Harrogate and  
16 District NHS Foundation Trust) and Peter Hammond (Harrogate and District NHS  
17 Foundation Trust).

#### References:

1. Krinsley JS. Association between hyperglycemia and increased hospital mortality in a heterogeneous population of critically ill patients. *Mayo Clinic proceedings Mayo Clinic.* 2003; 78(12):1471-8
2. Umpierrez GE, Isaacs SD, Bazargan N, You X, Thaler LM, Kitabchi AE. Hyperglycemia: an independent marker of in-hospital mortality in patients with undiagnosed diabetes. *The Journal of clinical endocrinology and metabolism.* 2002;87(3):978-82.
3. Hypoglycaemia is associated with increased length of stay and mortality in people with diabetes who are hospitalized. Nirantharakumar K, Marshall T, Kennedy A, Narendran P, Hemming K, Coleman JJ. *Diabet Med.* 2012; 29(12):e445-8.
4. Hypoglycemia as a predictor of mortality in hospitalized elderly patients. Kagansky N, Levy S, Rimon E, et al. *Arch Intern Med.* 2003; 163(15):1825-9.

- 1  
2  
3 5. Hypoglycemia and clinical outcomes in patients with diabetes hospitalized in the general  
4 ward. Turchin A, Matheny ME, Shubina M, Scanlon JV, Greenwood B, Pendergrass ML.  
5 Diabetes Care. 2009; 32(7):1153-7.  
6  
7
- 8  
9  
10 6. Intensive versus conventional glucose control in critically ill patients. NICE-SUGAR  
11 Study Investigators, Finfer S, Chittock DR, Su SY, et al. N Engl J Med. 2009; 360(13):1283-  
12 97.  
13
- 14  
15  
16 7. Intensive insulin therapy and mortality among critically ill patients: a meta-analysis  
17 including NICE-SUGAR study data. Griesdale DE, de Souza RJ, van Dam RM, et al. CMAJ.  
18 2009; 180(8):821-7.  
19  
20  
21
- 22  
23 8. Intensive glucose control and hypoglycaemia: a new cardiovascular risk factor? Rana OA,  
24 Byrne CD, Greaves K. Heart. 2013 May 22; [Epub ahead of print]  
25  
26  
27
- 28 9. National Diabetes Inpatient Audit (NaDIA) - 2012. Available at  
29 <http://www.hscic.gov.uk/catalogue/PUB10506>. Last accessed 04/10/2013.  
30  
31  
32
- 33 10. Standards of medical care in diabetes-2013. American Diabetes Association. Diabetes  
34 Care. 2013; 36 Suppl 1:S11-66.  
35  
36  
37
- 38 11. Diurnal temporal patterns of hypoglycaemia in hospitalized people with diabetes may  
39 reveal potentially correctable factors. Kerry C, Mitchell S, Sharma S, Scott A, Rayman G.  
40 Diabet Med. 2013 30(12):1403-1406.  
41  
42  
43
- 44 12. The hospital management of hypoglycaemia in adults with diabetes mellitus. Joint British  
45 Diabetes Society Guideline. Available at <http://www.diabetologists-abcd.org.uk/JBDS/JBDS.htm>.  
46 Last accessed 25-01-2014.  
47  
48  
49
- 50  
51 13. Hypoglycemia requiring ambulance services in patients with type 2 diabetes is associated  
52 with increased long-term mortality. Parsaik AK, Carter RE, Myers LA, Basu A, Kudva YC.  
53 Endocr Pract. 2013; 19(1):29-35.  
54  
55  
56  
57  
58  
59  
60

- 1  
2  
3 14. Sulphonyurea as a cause of severe hypoglycaemia in the community. Ng JM, Mellor DD,  
4 Masson EA, Allan BJ. *Prim Care Diabetes*. 2010; 4(1):61-3.  
5  
6
- 7  
8 15. Characteristics of patients with sulphonurea-induced hypoglycemia. Schejter YD, Turvall  
9 E, Ackerman Z. *J Am Med Dir Assoc*. 2012; 13(3):234-8.  
10  
11
- 12  
13 16. Hypoglycemia in hospitalized patients treated with sulfonylureas. Deussenberry CM,  
14 Coley KC, Korytkowski MT, Donihi AC. *Pharmacotherapy* 2012; 32(7): 613-7.  
15  
16
- 17  
18 17. Lack of confidence among trainee doctors in the management of diabetes: the Trainees  
19 Own Perception of Delivery of Care (TOPDOC) Diabetes Study. George JT, Warriner D,  
20 McGrane DJ, et al; TOPDOC Diabetes Study Team. *QJM*. 2011; 104(9):761-6.  
21  
22
- 23  
24 18. Randomized study of basal-bolus insulin therapy in the inpatient management of patients  
25 with type 2 diabetes (RABBIT 2 trial). Umpierrez GE, Smiley D, Zisman A, et al. *Diabetes*  
26 *Care*. 2007; 30(9):2181-6.  
27  
28
- 29  
30 19. Randomized study of basal-bolus insulin therapy in the inpatient management of patients  
31 with type 2 diabetes undergoing general surgery (RABBIT 2 surgery). Umpierrez GE, Smiley  
32 D, Jacobs S, et al. *Diabetes Care*. 2011; 34(2):256-61.  
33  
34
- 35  
36 20. Safer administration of insulin: summary of a safety report from the National Patient  
37 Safety Agency. Lamont T, Cousins D, Hillson R, Bischler A, Terblanche M. *BMJ*. 2010;  
38 341:c5269.  
39  
40
- 41  
42 21. Prescribing errors in diabetes. Cox RA, Ferner ER. *Br J Diabetes Vasc Dis* 2009; 9:84–88  
43  
44
- 45  
46 22. Insulin, hospitals and harm: a review of patient safety incidents reported to the National  
47 Patient Safety Agency. Cousins D, Rosario C, Scarpello J. *Clin Med*. 2011; 11(1):28-30.  
48  
49
- 50  
51 23. Serious harm from inpatient hypoglycaemia: a survey of hospitals in the UK. Rajendran  
52 R, Rayman G. *Diabet Med*. 2014 April 7 doi: 10.1111/dme.12457. [Epub ahead of print]  
53  
54
- 55  
56 24. E-prescribing: clinical implications for patients with diabetes. Smith M, Dang D, Lee J.  
57  
58  
59  
60

1  
2  
3 J Diabetes Sci Technol. 2009; 3(5):1215-8.  
4  
5

6 25. Clinical decision support systems in the care of inpatients with diabetes in non-critical  
7 care setting: systematic review. Nirantharakumar K, Chen YF, Marshall T, Webber J,  
8 Coleman JJ. Diabet Med. 2012; 29(6):698-708.  
9  
10

11  
12 26. NHS Diabetes guideline for the perioperative management of the adult patient with  
13 diabetes. Dhatariya K, Levy N, Kilvert A, et al; Joint British Diabetes Societies. Diabet Med.  
14 2012; 29(4):420-33.  
15  
16  
17  
18  
19  
20  
21  
22  
23  
24  
25  
26  
27  
28  
29  
30  
31  
32  
33  
34  
35  
36  
37  
38  
39  
40  
41  
42  
43  
44  
45  
46  
47  
48  
49  
50  
51  
52  
53  
54  
55  
56  
57  
58  
59  
60

1  
2  
3  
4  
5  
6  
7  
8  
9  
10  
11  
12  
13  
14  
15  
16  
17  
18  
19  
20  
21  
22  
23  
24  
25  
26  
27  
28  
29  
30  
31  
32  
33  
34  
35  
36  
37  
38  
39  
40  
41  
42  
43  
44  
45  
46  
47  
48  
49  
50  
51  
52  
53  
54  
55  
56  
57  
58  
59  
60

| Variable | Each individual Trust data | Combined |
|----------|----------------------------|----------|
|----------|----------------------------|----------|

For peer review only

|                                                                                                       |                      |        |             |             |       |             |             |             |             |             |             |       |      |
|-------------------------------------------------------------------------------------------------------|----------------------|--------|-------------|-------------|-------|-------------|-------------|-------------|-------------|-------------|-------------|-------|------|
| Number of beds*                                                                                       |                      | 1      | 2           | 3           | 4     | 5           | 6           | 7           | 8           | 9           | 10          | 11    | 6157 |
| Diabetes Inpatient Specialist Nurse time devoted to inpatient diabetes care†                          |                      | 75.5   | 97          | 30          | 20    | 20          | 78          | 75          | 52          | 10          | 32          | 48.5  | 538  |
| Number of 'at risk' subjects                                                                          | All                  | 85     | 82          | 40          | 43    | 67          | 156         | 73          | 155         | 50          | 74          | 41    | 866  |
|                                                                                                       | Insulin              | 50     | 56          | 26          | 18    | 39          | 103         | 44          | 96          | 29          | 52          | 28    | 541  |
|                                                                                                       | Sulphonylurea        | 32     | 25          | 12          | 22    | 24          | 44          | 22          | 52          | 18          | 20          | 12    | 283  |
|                                                                                                       | Both‡                | 3      | 1           | 2           | 3     | 4           | 9           | 7           | 7           | 3           | 2           | 1     | 42   |
| Number of hypoglycaemic readings                                                                      | All                  | 334    | 163         | 136         | 115   | 264         | 432         | 234         | 316         | 159         | 198         | 170   | 2521 |
|                                                                                                       | Insulin              | 219    | 107         | 90          | 61    | 161         | 257         | 161         | 199         | 96          | 118         | 125   | 1594 |
|                                                                                                       | Sulphonylurea        | 105    | 55          | 34          | 51    | 89          | 154         | 61          | 104         | 46          | 68          | 34    | 801  |
|                                                                                                       | Both‡                | 10     | 1           | 12          | 3     | 14          | 21          | 12          | 13          | 17          | 12          | 11    | 126  |
|                                                                                                       | Mild hypoglycaemia   | 239    | 124         | 86          | 81    | 177         | 309         | 165         | 203         | 103         | 134         | 108   | 1729 |
| Severe hypoglycaemia                                                                                  | 95                   | 39     | 50          | 34          | 87    | 123         | 69          | 113         | 56          | 64          | 62          | 792   |      |
| Hypoglycaemia per 100 bed ratio§                                                                      | All                  | 62.2   | 23.6        | 39.5        | 43.6  | 58.8        | 46          | 34.4        | 31.7        | 58          | 28.7        | 58    | 41   |
|                                                                                                       | Mild hypoglycaemia   | 44.5   | 18          | 25          | 30.7  | 39.4        | 32.9        | 24.3        | 20.4        | 37.6        | 19.4        | 36.9  | 28.1 |
|                                                                                                       | Severe hypoglycaemia | 17.7   | 5.6         | 14.5        | 12.9  | 19.4        | 13.1        | 10.1        | 11.3        | 20.4        | 9.3         | 21.1  | 12.9 |
| Hypoglycaemic readings per subject                                                                    | Median               | 2      | 1           | 2           | 2     | 3           | 2           | 2           | 2           | 2           | 1           | 2     | 2    |
|                                                                                                       | Mean                 | 3.93   | 1.99        | 3.4         | 2.7   | 3.94        | 2.77        | 3.21        | 2.04        | 3.18        | 2.68        | 4.15  | 2.91 |
|                                                                                                       | Range                | 1-29   | 1-9         | 1-11        | 1-23  | 1-18        | 1-16        | 1-13        | 1-11        | 1-12        | 1-14        | 1-30  | 1-30 |
| Subjects with ≥5 readings of hypoglycaemia during the study period                                    |                      | 20     | 7           | 10          | 5     | 18          | 27          | 15          | 15          | 11          | 15          | 11    | 154  |
| Frequency of glucose monitoring                                                                       | Insulin              | BD-QDS | QDS and 3am | QDS         | QDS   | BD-QDS      | QDS         | QDS         | QDS         | QDS         | QDS         | QDS   | -    |
|                                                                                                       | Sulphonylurea        | BD-QDS | QDS and 3am | BD-QDS      | BD    | BD-QDS      | BD-QDS      | QDS         | BD-QDS      | QDS         | OD-QDS      | QDS   | -    |
| Hospital meal timings                                                                                 | Breakfast            | 7:30   | 7:00        | 7:00-8:00   | 8:30  | 7:30-8:30   | 7:00-9:00   | 7:30-8:30   | 7:45-8:30   | 7:45-8:30   | 7:00-8:00   | 8:00  | -    |
|                                                                                                       | Afternoon meal       | 12:00  | 12:00       | 12:00-13:00 | 12:15 | 12:00-13:00 | 12:00-14:00 | 11:30-12:45 | 12:00-13:00 | 12:00-13:00 | 12:00-13:00 | 12:00 | -    |
|                                                                                                       | Evening meal         | 17:00  | 17:00       | 18:00-19:00 | 17:00 | 17:00-18:00 | 17:00-19:00 | 16:30-17:45 | 17:00-18:00 | 17:00-18:00 | 17:00-18:00 | 17:00 | -    |
| <b>Time period of hypoglycaemic readings</b>                                                          |                      |        |             |             |       |             |             |             |             |             |             |       |      |
| Daytime                                                                                               | 09:00-14:59          | 75     | 30          | 25          | 8     | 33          | 61          | 45          | 46          | 25          | 14          | 31    | 393  |
|                                                                                                       | 15:00-20:59          | 50     | 33          | 29          | 25    | 51          | 78          | 46          | 65          | 24          | 41          | 47    | 489  |
| Night-time                                                                                            | 09:00-20:59          | 125    | 63          | 54          | 33    | 84          | 139         | 91          | 111         | 49          | 55          | 78    | 882  |
|                                                                                                       | 21:00-02:59          | 93     | 36          | 36          | 34    | 69          | 133         | 68          | 76          | 45          | 51          | 45    | 686  |
|                                                                                                       | 03:00-08:59          | 116    | 64          | 46          | 48    | 111         | 160         | 75          | 129         | 65          | 92          | 47    | 953  |
| 21:00-08:59                                                                                           |                      | 209    | 100         | 82          | 82    | 180         | 293         | 143         | 205         | 110         | 143         | 92    | 1639 |
| Percentage of night-time hypoglycaemia                                                                |                      | 62.6   | 61.3        | 60.3        | 71.3  | 68.2        | 67.8        | 61.1        | 64.9        | 69.2        | 72.2        | 54.1  | 65   |
| *Bed numbers exclude paediatric, maternity and day case units                                         |                      |        |             |             |       |             |             |             |             |             |             |       |      |
| †Average Diabetes Inpatient Specialist Nurse time (hours per week) devoted to inpatient diabetes care |                      |        |             |             |       |             |             |             |             |             |             |       |      |
| ‡Subjects on both insulin and sulphonylurea therapy                                                   |                      |        |             |             |       |             |             |             |             |             |             |       |      |
| §Calculated as 100 * number of hypoglycaemic readings ÷ number of beds                                |                      |        |             |             |       |             |             |             |             |             |             |       |      |
| No Trust guaranteed the provision of a bedtime snack for inpatients with diabetes                     |                      |        |             |             |       |             |             |             |             |             |             |       |      |

**Table 1:**



Table 2:

| Variable                                                                                 | All                          | Insulin                                  | Sulphonyl urea                           | Both Insulin and Sulphonylureas          |                                         |
|------------------------------------------------------------------------------------------|------------------------------|------------------------------------------|------------------------------------------|------------------------------------------|-----------------------------------------|
| Number of subjects                                                                       | 866                          | 541                                      | 283                                      | 42                                       |                                         |
| Number of hypoglycaemic readings (%)                                                     | All                          | 2521                                     | 1594                                     | 801                                      | 126                                     |
|                                                                                          | Severe hypoglycaemia         | 792 (31.4)                               | 572 (35.9)                               | 180 (22.5)                               | 40 (31.7)                               |
|                                                                                          | Mild hypoglycaemia           | 1729 (68.6)                              | 1022 (64.1)                              | 621 (77.5)                               | 86 (68.3)                               |
| Subjects with $\geq 5$ readings of hypoglycaemia per subject during the study period (%) | 154 (17.8)                   | 96 (17.7)                                | 49 (17.3)                                | 9 (21.4)                                 |                                         |
| p=0.923                                                                                  |                              |                                          |                                          |                                          |                                         |
| Number of hypoglycaemic readings per subject                                             | Mean $\pm$ SD (Range)        | 2.91 $\pm$ 3.16 (1-30)                   | 2.95 $\pm$ 3.29 (1-30)                   | 2.83 $\pm$ 2.89 (1-29)                   | 3 $\pm$ 3.21 (1-12)                     |
|                                                                                          | Median (Interquartile range) | 2 (1-3)                                  | 2 (1-3)                                  | 2 (1-4)                                  | 1 (1-3.25)                              |
| p=0.888                                                                                  |                              |                                          |                                          |                                          |                                         |
| Age (years)                                                                              | Mean $\pm$ SD (Range)        | 71 $\pm$ 16 (18-98)                      | 67 $\pm$ 18 (18-97)                      | 76 $\pm$ 10 (42-98)                      | 75 $\pm$ 9 (46-91)                      |
|                                                                                          | Median (Interquartile range) | 75 (64-82)                               | 73 (56-81)                               | 78 (70-83)                               | 77 (69-81)                              |
| p=0.0001                                                                                 |                              |                                          |                                          |                                          |                                         |
| HbA1c in mmol/mol (%)                                                                    | Mean [Range]                 | n=575*<br>69(8.5)<br>[28(4.7)-177(18.3)] | n=364*<br>73(8.8)<br>[28(4.7)-177(18.3)] | n=181*<br>60(7.6)<br>[33(5.2)-161(16.9)] | n=30*<br>73(8.8)<br>[46(6.4)-115(12.7)] |
|                                                                                          | Median [Interquartile range] | 64(8)<br>[53(7)-80(9.5)]                 | 69(8.5)<br>[56(7.3)-83(9.7)]             | 56(7.3)<br>(47(6.5)-66(8.2))             | 73(8.8)<br>[55(7.2)-86(10)]             |
| p=0.0001                                                                                 |                              |                                          |                                          |                                          |                                         |
| Length of stay (days)                                                                    | Mean $\pm$ SD (Range)        | n=862*<br>17 $\pm$ 17.1 (1-101)          | n=540*<br>16.1 $\pm$ 17 (1-101)          | n=282*<br>17 $\pm$ 16.2 (1-100)          | n=40*<br>25 $\pm$ 21.9 (1-82)           |
|                                                                                          | Median (Interquartile range) | 11 (5-22)                                | 10 (4-21)                                | 11 (6-23)                                | 20 (7-45)                               |
| p=0.098                                                                                  |                              |                                          |                                          |                                          |                                         |
| <b>Temporal pattern of hypoglycaemic readings</b>                                        |                              |                                          |                                          |                                          |                                         |
| Daytime hypoglycaemia                                                                    | 09:00-14:59                  | 393                                      | 296                                      | 84                                       | 13                                      |
|                                                                                          | 15:00-20:59                  | 489                                      | 352                                      | 114                                      | 23                                      |
|                                                                                          | Total 09:00-20:59            | 882                                      | 648                                      | 198                                      | 36                                      |
| Night-time hypoglycaemia (%)                                                             | 21:00-02:59                  | 686                                      | 478                                      | 179                                      | 29                                      |
|                                                                                          | 03:00-08:59                  | 953                                      | 468                                      | 424                                      | 61                                      |
|                                                                                          | Total 21:00-08:59            | 1639 (65)                                | 946 (59.3)                               | 603 (75.3)                               | 90 (71.4)                               |
| p=0.0001                                                                                 |                              |                                          |                                          |                                          |                                         |
| *Subjects in whom data available                                                         |                              |                                          |                                          |                                          |                                         |

**Original article:****Title:**

Temporal patterns of hypoglycaemia and burden of sulphonylurea related hypoglycaemia in UK hospitals: a retrospective multi-centre audit of hospitalised patients with diabetes

**Correspondence to:**

Dr Gerry Rayman

Diabetes Centre, The Ipswich Hospital NHS Trust, Heath Road, Ipswich, IP4 5PD, UK

Email: [gerry.rayman@ipswichhospital.nhs.uk](mailto:gerry.rayman@ipswichhospital.nhs.uk)

Phone: 00441473704193

Fax: 00441473704183

**Authors:**

Dr Rajesh Rajendran, Christopher Kerry and Dr Gerry Rayman on behalf of the MaGIC study group

Dr Rajesh Rajendran, Research Fellow, Diabetes Centre, The Ipswich Hospital NHS Trust, Heath Road, Ipswich, IP4 5PD, UK

Christopher Kerry, Diabetes Specialist Nurse, Diabetes Centre, The Ipswich Hospital NHS Trust, Heath Road, Ipswich, UK, IP4 5PD, UK

Dr Gerry Rayman, Consultant Physician, Diabetes Centre, The Ipswich Hospital NHS Trust, Heath Road, Ipswich, IP4 5PD, UK

**Key words:**

Insulin

Sulphonylureas

Inpatient diabetes

Hypoglycaemia

Blood glucose

**Word Count:**

Abstract: 274, Manuscript content: 2883, Tables: 2, Figures: 2

**Abstract:**

Objectives: To determine whether temporal patterns of hypoglycaemia exist in inpatients with diabetes 'at risk' of hypoglycaemia (those on insulin and/or sulphonylureas), and if so whether patterns differ between hospitals and between these treatments.

Setting: Retrospective multicentre audit of inpatients with diabetes involving 11 acute UK NHS Trusts.

Participants: Capillary blood glucose readings of 3.9mmol/l or less (hypoglycaemia) for all inpatients with diabetes 'at risk' of hypoglycaemia were extracted from Abbott Precision Web Point-of-Care Data Management System™ over a four-week period. Overall 2,521 readings of 3.9mmol/l or less (hypoglycaemia) occurring in 866 subjects between 01/06/2013 and 29/06/2013 were analysed.

Interventions: Not applicable

Primary and secondary outcome measures: Not applicable

Results: The majority (65%) occurred between 21:00-08:59 hours, a pattern common to all Trusts. This was more frequent in sulphonylurea than insulin treated subjects (75.3% vs 59.3%,  $p=0.0001$ ). Furthermore, hypoglycaemic readings were more frequent between 05:00-07:59 hours in sulphonylurea than insulin treated subjects (46.7% vs 22.7% of readings for respective treatments,  $p=0.0001$ ). Sulphonylureas accounted for 31.8% of all hypoglycaemic readings. As a group, sulphonylurea treated subjects were older (median age 78 vs 73 years,  $p=0.0001$ ) and had lower HbA1c [median 56mmol/mol (7.3%) vs 69mmol/mol (8.5%),  $p=0.0001$ ]. Hypoglycaemic readings per subject were as frequent for sulphonylurea as for insulin treated subjects (median=2 for both) as were the proportion in each group with  $\geq 5$  readings (17.3% vs 17.7%).

Conclusions: In all Trusts hypoglycaemic readings were more frequent between 21:00-08:59 hours in 'at risk' inpatients with diabetes, with a greater frequency in the early morning period (05:00-07:59 hours) in sulphonylurea treated inpatients. This may have implications for the continuing use of sulphonylureas in the inpatient setting.

Trial registration: Not applicable.

1  
2  
3 **Article summary:**  
4  
5

6 **Strengths and limitations of this study:**  
7

- 8 1. This study reports the burden of sulphonylurea related inpatient hypoglycaemia in  
9 NHS Trusts which has not been previously documented.  
10  
11 2. This study reports that the risk of hypoglycaemia appears to be greater in  
12 sulphonylurea treated inpatients than insulin treated inpatients in early morning hours.  
13  
14 3. This study confirms a previous single centre report that hypoglycaemia occurs more  
15 commonly at night-time/early morning in NHS Trusts participating in this study.  
16  
17 4. One of the limitations of this study was the inability to obtain the total number of  
18 inpatients with diabetes, type of diabetes and proportion of inpatients treated with  
19 insulin and sulphonylureas who did not experience hypoglycaemia.  
20  
21 5. Another limitation was that the detection of hypoglycaemic readings was strongly  
22 influenced by glucose monitoring frequency which was pre-determined.  
23  
24  
25  
26  
27  
28  
29  
30  
31  
32  
33  
34  
35  
36  
37  
38  
39  
40  
41  
42  
43  
44  
45  
46  
47  
48  
49  
50  
51  
52  
53  
54  
55  
56  
57  
58  
59  
60

**Introduction:**

Until recently tight glycaemic control in inpatients has been considered to be important in reducing morbidity and mortality as previous studies have shown that inpatient hyperglycaemia is associated with poorer outcomes (1, 2). However its advantages are offset by the risk of hypoglycaemia. Although the available data does not conclusively suggest that inpatient hypoglycaemia is an independent risk factor for mortality per se, there is increasing evidence that it is associated with increased mortality, morbidity and length of stay (3-5). In the NICE-SUGAR multinational randomised control trial severe hypoglycaemia was thirteen times more frequent in the intensively treated group (6.8% vs 0.5%,  $p < 0.001$ ) in which there was found to be a significantly higher ninety-day mortality compared to the conventional group (6). Subsequently, a meta-analysis that included the NICE-SUGAR data concluded that tight glycaemic control (with insulin therapy) increased the risk of hypoglycaemia with no overall mortality benefit (7). Indeed, some have suggested that hypoglycaemia should now be considered a new factor for cardiovascular risk (8).

The burden of inpatient hypoglycaemia in NHS hospitals has been well highlighted by the annual National Diabetes Inpatient Audit (NaDIA), the largest one week snapshot audit covering >95% of all acute NHS Trusts in England and Wales. In 2012, NaDIA reported that in England alone, 22.4% of inpatients experienced at least one hypoglycaemic episode [capillary blood glucose (CBG)  $\leq 3.9$ mmol/l] and 2.2% had at least one hypoglycaemic episode that required rescue injectable therapy (9). Hypoglycaemia was significantly higher in those on insulin therapy; 45.3% of patients with type 1 diabetes and 31.8% of patients with type 2 diabetes treated with insulin had at least one episode of hypoglycaemia (9).

The American Diabetes Association (ADA) recommendation that insulin therapy in the form of a basal bolus regimen should be used as the preferred method of achieving and maintaining glycaemic control for all inpatients with diabetes has been widely adopted in the US (10). In the UK, there is no national consensus on the type of therapy that should be used for managing inpatients with diabetes who had not previously been on insulin i.e. whether oral agents be continued or there be a temporary switch to insulin therapy. Reluctance to adopt the ADA recommendation is supported by the frequency of drug errors and hypoglycaemia associated with insulin use from NaDIA data (9). However, to date, the extent of inpatient hypoglycaemia in the UK from the use of oral agents that can precipitate hypoglycaemia, namely sulphonylurea therapy is unknown.

1  
2  
3  
4  
5  
6  
7  
8  
9  
10  
11  
12  
13  
14  
15  
16  
17  
18  
19  
20  
21  
22  
23  
24  
25  
26  
27  
28  
29  
30  
31  
32  
33  
34  
35  
36  
37  
38  
39  
40  
41  
42  
43  
44  
45  
46  
47  
48  
49  
50  
51  
52  
53  
54  
55  
56  
57  
58  
59  
60

In a recent study of inpatient hypoglycaemia in one NHS hospital, we found that more than two-thirds of all hypoglycaemic readings occurred between 21:00-08:59 hours (11). The current study was designed to determine whether similar or other temporal patterns of hypoglycaemia exist in other NHS hospitals and if so, to consider the possible reasons for any observed differences and potential preventative strategies. Additionally, in the previous study there appeared to be more hypoglycaemic readings in those on sulphonylurea therapy than anticipated, but that study was not specifically designed to examine this (11). As a result of this anecdotal observation and in view of the ADA's abandonment of sulphonylurea therapy in the inpatient setting, the current study was also designed to compare hypoglycaemic rates and patterns in sulphonylurea and insulin treated inpatients.

### Methods:

The Joint British Diabetes Society (JBDS) recommends all adults with blood glucose  $\leq 3.9$ mmol/l in hospitals be treated whether or not they are symptomatic (12). We therefore defined hypoglycaemia in our inpatient cohort as CBG  $\leq 3.9$ mmol/l irrespective of the presence or absence of symptoms. Severe hypoglycaemia is usually defined as an episode of hypoglycaemia requiring third party assistance. This definition is not applicable to inpatients as most patients will not have direct access to carbohydrates and therefore require third party assistance from a health care professional even if the event was mild. We therefore used NaDIA 2012's biochemical classification of hypoglycaemia in which mild hypoglycaemia is defined as a CBG 3-3.9mmol/l and severe hypoglycaemia as a CBG  $\leq 2.9$ mmol/l, irrespective of symptoms and necessity for third party assistance (9). Although not strictly correct, for the purpose of this study, we defined night-time hypoglycaemia as that between 21:00-08:59 hours and daytime hypoglycaemia as that between 09:00-20:59 hours.

The study was a four week retrospective multi-centre audit, undertaken between 01/06/13 and 29/06/13 in 11 NHS Trusts. Institutional approval was obtained from the audit department of each individual NHS Trust. All Trusts used Precision Xceed Pro<sup>TM</sup> as the only CBG monitoring system across the entire hospital. All CBG readings were relayed remotely to Precision Web Point-of-Care Data Management System<sup>TM</sup> (Abbott Diabetes Care Inc., Alameda, CA 94502, USA). From this database, all CBG readings of  $\leq 3.9$ mmol/l were extracted at each NHS site including patients' unique identifiers, ward location, date and time of measurement. Each CBG reading of  $\leq 3.9$ mmol/l was considered as an episode but

1  
2  
3 recurrent readings of  $\leq 3.9$  mmol/l within 2 hours of a previously documented hypoglycaemic  
4 episode were automatically excluded as they could reflect re-testing for the same event.  
5  
6

7  
8 We included adult ( $\geq 18$  years) inpatients with diabetes 'at risk' of hypoglycaemia i.e. those  
9 treated with insulin and/or sulphonylureas. Data from Accident and Emergency departments,  
10 paediatric and day case areas were excluded. Age, length of stay until 15/07/13, type of  
11 therapy and HbA1c (within the preceding 3 months) data were collected from retrospective  
12 review of case records. Hospital bed numbers (excluding maternity and the previously  
13 mentioned areas) and factors that could influence institutional hypoglycaemia rates such as  
14 average weekly hours spent by diabetes specialist staff on inpatient diabetes care, meal  
15 timings, bedtime snack availability and frequency of CBG monitoring were obtained.  
16  
17  
18  
19  
20  
21

#### 22 Statistics:

23  
24 After completion of data collection, unique patient identifiers were removed and results were  
25 analysed using Microsoft Excel 2007, GraphPad and IBM SPSS Statistics v20. Descriptive  
26 statistics were used to evaluate characteristics of study subjects. Unpaired t test was used to  
27 compare means in parametric continuous data and Wilcoxon-Mann-Whitney test to compare  
28 non-parametric continuous data. Fisher's exact test was used to compare categorical data.  
29 Pearson correlation was used to evaluate linear correlation. All p values are two tailed and  
30  $< 0.05$  was considered statistically significant.  
31  
32  
33  
34  
35  
36  
37

#### 38 Results:

39  
40 Overall, 2,521 hypoglycaemic readings in 866 subjects from 11 NHS Trusts were analysed  
41 (Tables 1 and 2). Hypoglycaemia was exclusively attributable to sulphonylureas in 32.7% of  
42 all subjects who had recorded hypoglycaemia and accounted for 31.8% of all hypoglycaemic  
43 readings. In subjects exclusively treated with sulphonylurea therapy, 22.5% of readings were  
44 severe as opposed to 35.9% in insulin treated subjects. There was no difference in the  
45 percentage of subjects experiencing  $\geq 5$  hypoglycaemic readings between those treated with  
46 sulphonylureas and those on insulin therapy (17.3% vs 17.7%,  $p=0.923$ ). Additionally, the  
47 number of hypoglycaemic readings per subject was the same for sulphonylurea and insulin  
48 treated subjects (median= 2 for both,  $p=0.888$ ). Length of stay was similar between the two  
49 groups (median 11 vs 10 days,  $p=0.098$ ). Subjects on sulphonylureas were significantly older  
50 (median age 78 vs 73 years,  $p=0.0001$ ) and had lower HbA1c [median 56 mmol/mol (7.3%)  
51 vs 69 mmol/mol (8.5%),  $p=0.0001$ ]. Length of stay correlated significantly with the number  
52  
53  
54  
55  
56  
57  
58  
59  
60

1  
2  
3 of hypoglycaemic readings per subject for both insulin ( $r=0.286$ ,  $p=0.0001$ ) and  
4 sulphonylurea ( $r=0.167$ ,  $p=0.005$ ) treated subjects but did not correlate with age and HbA1c.  
5  
6

7  
8 Temporal pattern analysis showed that hypoglycaemic readings were most frequent between  
9 05:00-07:59 hours. Not surprisingly, the other frequent times coincided with glucose  
10 monitoring times i.e. before lunch, evening meal and bedtime. Interestingly, a significant  
11 number of hypoglycaemic readings occurred between 02:00-02:59 hours in all Trusts (even  
12 though routine 3am glucose monitoring was performed only by Trust 2). The observed  
13 patterns were similar in all Trusts (Figure 1). The relative frequency of hypoglycaemic  
14 readings between 05:00-07:59 hours in sulphonylurea treated subjects was twice that of the  
15 insulin treated subjects (46.7% vs 22.7%,  $p=0.0001$ ), despite similar glucose monitoring  
16 frequency for both therapies (Figure 2). Overall, 65% of all hypoglycaemic readings occurred  
17 at night-time, ranging from 54.1% to 72.2% across the 11 Trusts. This was significantly  
18 greater in sulphonylurea compared to insulin treated subjects (75.3% vs 59.3%,  $p=0.0001$ ).  
19 There was a positive correlation between proportion of night-time to daytime hypoglycaemic  
20 readings and proportion of hypoglycaemic readings attributable to sulphonylureas for each  
21 Trust ( $r=0.787$ ,  $p=0.004$ ). There was no significant difference in the number of  
22 hypoglycaemic readings per day between weekdays and weekends [mean (SD)  $88.15\pm 16.95$   
23 vs  $84.22\pm 12.16$ ,  $p=0.538$ ]. There was no relationship between the time reported to be spent  
24 by diabetes specialist nurses on inpatient care and hypoglycaemic readings per 100 bed ratio  
25 ( $r=-0.342$ ,  $p=0.303$ ).  
26  
27  
28  
29  
30  
31  
32  
33  
34  
35  
36  
37  
38

### 39 Discussion:

40 Having expected to find variations in temporal patterns of hypoglycaemic readings related to  
41 differing clinical practices we found that all Trusts demonstrated the same pattern of  
42 hypoglycaemia as seen in the index hospital (11). We had previously postulated that  
43 prolonged fasting (14 hours) between evening meal and breakfast as well as the lack of  
44 bedtime carbohydrate snacks in the index hospital as important contributory factors. It is  
45 therefore of interest that all Trusts in this study reported similar prolonged fasting (13.5-15.5  
46 hours) after the evening meal and that none guaranteed the provision of bedtime carbohydrate  
47 snacks. This feeding practice appears to be common in UK hospitals as reported in our  
48 previous online survey of NHS Trusts (11). We believe that addressing these meal timings  
49 and provision of bedtime carbohydrate snacks could reduce the frequency of hypoglycaemia  
50 in UK hospitals.  
51  
52  
53  
54  
55  
56  
57  
58  
59  
60



1  
2  
3  
4  
5  
6  
7  
8  
9  
10  
11  
12  
13  
14  
15  
16  
17  
18  
19  
20  
21  
22  
23  
24  
25  
26  
27  
28  
29  
30  
31  
32  
33  
34  
35  
36  
37  
38  
39  
40  
41  
42  
43  
44  
45  
46  
47  
48  
49  
50  
51  
52  
53  
54  
55  
56  
57  
58  
59  
60

The second important finding was the extent of inpatient hypoglycaemia related to the use of sulphonylurea therapy. Whilst the burden of sulphonylurea related hypoglycaemia needing emergency medical assistance is increasingly recognised in the community setting (13-15), its contribution to inpatient hypoglycaemia appears not to have been fully appreciated. In this study we found that one third of hypoglycaemic readings were related to sulphonylurea therapy and indeed the frequency of inpatients experiencing markedly recurrent hypoglycaemia ( $\geq 5$  hypoglycaemic readings) was the same as those receiving insulin. In a recent single centre report from one of the few US hospitals where oral agents continue to be used in the management of inpatient diabetes, one in five patients treated with sulphonylureas experienced at least one hypoglycaemic episode during their inpatient stay (16). In our study it was not possible to determine this as the initial source data was hypoglycaemic readings recorded in the Precision Web Point-of-Care Data Management System<sup>TM</sup> and therefore the total number of inpatients with diabetes was not known. In addition, for the same reason, it was not possible determine whether those with low eGFR had more hypoglycaemia, nor whether different insulin regimes were associated with greater risk.

There are a number of factors that may contribute to frequent hypoglycaemia in inpatients on sulphonylurea therapy. Health care professionals have greater concern for insulin treated inpatients than those on tablets who are often considered to have less severe diabetes and therefore perceived less likely to suffer hypoglycaemia. Physicians, nurses and even the small subgroup of patients who self-manage their diabetes in hospital are less inclined to adjust doses of oral hypoglycaemic agents than insulin even during periods of varying meal intake. This is reflected in the TOPDOC study of UK trainee-doctors, who when given an example of a patient with poor control, were less likely to alter the dose of oral agents compared to insulin (65% vs 79%) (17). Finally, the pharmacokinetic profile of sulphonylureas are less predictable compared to insulin especially in the complex inpatient setting with changing nutritional status, renal function etc.

In the US, insulin therapy is the preferred treatment for all inpatients with diabetes (10). The basal-bolus system, utilising well tested insulin regimens such as the RABBIT medical and surgical protocols are extensively used and have been shown to be associated with low frequencies of inpatient hypoglycaemia (18, 19). It is unlikely that such regimens will be adopted in the UK in the near future as this would require transferring up to one in six

1  
2  
3 inpatients with diabetes to basal-bolus insulin therapy, when at present the expertise for  
4 initiating and monitoring inpatients on insulin therapy is very limited. Thus, NaDIA 2012  
5 found that 32.2% of NHS England Trusts did not have a dedicated diabetes inpatient  
6 specialist nurse (9). Secondly, very serious concerns have been raised on the safe use of  
7 insulin in inpatients in UK (20-22). The National Patient Safety Agency identified 16,600  
8 reported incidents involving insulin between November 2003 and November 2009, the  
9 majority occurring in inpatients; 24% caused harm to the patient and there were 18 individual  
10 incidences associated with fatal or severe outcomes (22). Importantly these figures represent  
11 the tip of the iceberg as it is recognised that such errors are grossly under-reported in the UK.  
12 Thus, in contrast, NaDIA 2012 found that in England 21.8% of inpatients with diabetes  
13 treated with insulin therapy in the week of the audit had one or more insulin errors,  
14 summing to one hundred and fifty thousand errors each year (9). Furthermore, in a recent  
15 retrospective survey of diabetes inpatient teams at least twelve episodes of serious harm  
16 related to inpatient hypoglycaemia (including death, cardiac arrest and irreversible brain  
17 injury) were reported to have occurred in the 41 UK Trusts who participated in the survey  
18 covering a twelve month period. Insulin therapy was implicated in at least ten of these events  
19 (23). It is hoped that in the future electronic prescribing and clinical decision support systems  
20 will help to minimise these errors while recognising that such systems are not infallible and  
21 will not prevent errors in insulin administration nor in management decisions (24, 25).  
22  
23  
24  
25  
26  
27  
28  
29  
30  
31  
32  
33  
34  
35

36 Finally, one of the aims of this multi-site study was to identify and learn from differences  
37 between Trusts. Trust 2 had the lowest frequency of both mild and severe hypoglycaemia per  
38 100 beds and the lowest number of recurrent hypoglycaemic readings. It may be relevant that  
39 this Trust introduced a number of changes in practice to reduce their institutional  
40 hypoglycaemia rates following a fatal adverse event related to inpatient hypoglycaemia.  
41 These included intentionally relaxing inpatient glycaemic targets to 7-11mmol/l in  
42 comparison with the currently recommended acceptable range of 4-12mmol/l (26),  
43 introducing an aggressive capillary glucose monitoring regimen including 3am glucose  
44 testing (the only trust to do so) and implementing intensive education programs for nursing  
45 and medical staff achieved by increasing the number of inpatient diabetes specialist nurses  
46 and their time devoted to inpatient care (Table 1). Whether replicating these practices in other  
47 Trusts would lead to reductions in their institutional hypoglycaemia rates can only be  
48 speculated.  
49  
50  
51  
52  
53  
54  
55  
56  
57  
58  
59  
60

1  
2  
3 We recognise several limitations to our study. The source data was the Precision Web Point-  
4 of-Care Data Management System<sup>TM</sup>; as a result we were unable to obtain the total number of  
5 inpatients with diabetes, a breakdown by type of diabetes, and the proportions treated with  
6 insulin and sulphonylureas who did not experience hypoglycaemia. Therefore, we were  
7 unable to calculate the exact risk with each therapy per se. The detection of hypoglycaemic  
8 readings was strongly influenced by glucose monitoring frequency which was pre-determined  
9 and similar in all hospitals; occurring at meal times and bedtime. Continuous glucose  
10 monitoring would almost certainly reveal an even greater frequency of hypoglycaemic  
11 readings, especially at night-time when patients are not routinely monitored. As previously  
12 mentioned while hospital meal times may be a major contributory factor for the frequency of  
13 night-time and early morning hypoglycaemia, we acknowledge that we did not consider other  
14 important factors for hypoglycaemia in hospitalised patients such as sepsis, renal and liver  
15 disease, overall nutritional status and changing drug therapies such as tapering of steroid  
16 therapy. Despite these limitations we believe that this study provides important information  
17 on institutional patterns of inpatient hypoglycaemia in the 'at risk' inpatients and the impact  
18 of sulphonylurea therapies.  
19  
20  
21  
22  
23  
24  
25  
26  
27  
28  
29  
30

31 In summary in UK hospitals, hypoglycaemia is detected more frequently during the period  
32 between 21:00-08:59 hours (night-time), and sulphonylurea therapy appears to present a  
33 greater risk than insulin particularly between 05:00-07:59 hours (early morning). Institutional  
34 feeding patterns appear to be contributory but further work is required to determine whether a  
35 change in meal times would reduce institutional hypoglycaemia rates. Importantly, our  
36 findings may have implications for the continued use of sulphonylureas in the UK in the  
37 inpatient setting.  
38  
39  
40  
41  
42  
43  
44

#### 45 **What is already known on this topic?**

46 A single NHS Trust previously reported that hypoglycaemia was more frequent at night-time  
47 in hospitalised patients.  
48

49 It was not known whether this pattern was common in other NHS Trusts.

50 The burden of inpatient hypoglycaemia due to sulphonylurea therapy was not previously  
51 known in NHS Trusts.  
52  
53  
54  
55  
56  
57  
58  
59  
60

**What this study adds:**

Hypoglycaemia is detected more commonly at night-time/early morning in all participating NHS Trusts.

Similar problems with institutional feeding patterns exist in all participating NHS Trusts.

There is a substantial burden of sulphonylurea related inpatient hypoglycaemia and it appears to present a greater risk than insulin therapy in early morning hours.

These observations should lead to a review of feeding times and the use of sulphonylureas in hospitalised patients.

**Figure legends:**

Figure 1: Temporal patterns of hypoglycaemic readings over the 24 hour period in the individual 11 NHS Trusts. The x axis represent the time period, for e.g. 0 represents the time period between 00:00 and 00:59 hours, 1 represents the time period between 01:00 and 01:59 hours etc. The y axis represents the number of hypoglycaemic readings occurring in that time period. The figure demonstrates very similar temporal patterns for all Trusts.

Figure 2: Temporal patterns of hypoglycaemic readings over the 24 hour period in all subjects on insulin, sulphonylureas and both. The x axis represent the time period, for e.g. 0 represents the time period between 00:00 and 00:59 hours, 1 represents the time period between 01:00 and 01:59 hours etc. The y axis represents the number of hypoglycaemic readings occurring in that time period. The figure demonstrates that the highest frequency occurs between 05:00 to 07:59 hours for both insulin and sulphonylurea therapies. .

Table 1: Table represents individual data from the 11 NHS Trusts.

Table 2: Table shows combined data from all Trusts for subjects on insulin, sulphonylureas or both forms of therapy.

**Copyright/licence for publication statement:**

The Corresponding Author has the right to grant on behalf of all authors and does grant on behalf of all authors, a worldwide licence to the Publishers and its licensees in perpetuity, in all forms, formats and media (whether known now or created in the future), to i) publish, reproduce, distribute, display and store the Contribution, ii) translate the Contribution into other languages, create adaptations, reprints, include within collections and create summaries,

1  
2  
3 extracts and/or, abstracts of the Contribution, iii) create any other derivative work(s) based on  
4 the Contribution, iv) to exploit all subsidiary rights in the Contribution, v) the inclusion of  
5 electronic links from the Contribution to third party material where-ever it may be located;  
6 and, vi) licence any third party to do any or all of the above.  
7  
8  
9

10  
11 **Declaration of competing interests:**  
12

13 All three authors have completed the ICMJE uniform disclosure form at  
14 [www.icmje.org/coi\\_disclosure.pdf](http://www.icmje.org/coi_disclosure.pdf) and declare: the MaGIC study group meetings were  
15 sponsored by Abbott, UK who also assisted in extraction of data from Precision Web Point-  
16 of-Care Data Management System<sup>TM</sup> but was not involved in the design or origin of the  
17 study, nor in funding or influencing the analysis, nor in interpretation or reporting of the data  
18 nor in the preparation of this manuscript; no financial relationships with any organisations  
19 that might have an interest in the submitted work in the previous three years; no other  
20 relationships or activities that could appear to have influenced the submitted work.  
21  
22  
23  
24  
25  
26  
27

28 **Transparency declaration statement:**  
29

30 The lead author RR (the manuscript's guarantor) affirms that the manuscript is an honest,  
31 accurate, and transparent account of the study being reported; that no important aspects of the  
32 study have been omitted; and that any discrepancies from the study as planned have been  
33 explained.  
34  
35  
36  
37

38 **Data sharing statement:**  
39

40 No additional data is available.  
41  
42

43 **Contributorship and authorship statement:**  
44

45 RR designed data collection tools, monitored data collection, cleaned and analysed the data,  
46 drafted and revised the paper. He is the guarantor. CK assisted in data collection and revised  
47 the draft paper. GR initiated the audit, monitored data collection, drafted and revised the  
48 paper and was the lead for the audit. All other members of MaGIC study group designed the  
49 audit, assisted in data collection and revised the draft paper. The following are members of  
50 the MaGIC (Managing Glycaemia using Innovations in Care) study group (UK): Gerry  
51 Rayman (Group lead, The Ipswich Hospital NHS Trust), Rajesh Rajendran (The Ipswich  
52 Hospital NHS Trust), Chris Kerry (The Ipswich Hospital NHS Trust), Ainslie Lang (Royal  
53 United Hospital Bath NHS Trust), James Young (Worcestershire Acute Hospitals NHS  
54  
55  
56  
57  
58  
59  
60

1  
2  
3 Trust), Lisa Smith (Worcestershire Acute Hospitals NHS Trust), Jane Wilson (Worcestershire  
4 Acute Hospitals NHS Trust), Erwin Castro (East Essex Healthcare NHS Trust), Valerie  
5 Edwards (East Essex Healthcare NHS Trust), Fathi Abourawi (Northern Lincolnshire and  
6 Goole Hospitals NHS Foundation Trust), Caroline Andrews (Northern Lincolnshire and  
7 Goole Hospitals NHS Foundation Trust), Francesca Swords (Norfolk and Norwich  
8 University Hospitals NHS Foundation Trust), Michelle Nation (The Royal Bournemouth and  
9 Christchurch Hospitals NHS Foundation Trust), Beverley Eaglesfield (Derby Hospitals NHS  
10 Foundation Trust), Anne Lee (Derby Hospitals NHS Foundation Trust), Kim Heathcote  
11 (NHS Dumfries and Galloway), Fiona Green (NHS Dumfries and Galloway), Louise Clark  
12 (NHS Dumfries and Galloway), Jenny Tringham (Frimley Park Hospital NHS Foundation  
13 Trust), Laura Dinning (Harrogate and District NHS Foundation Trust) and Peter Hammond  
14 (Harrogate and District NHS Foundation Trust).  
15  
16  
17  
18  
19  
20  
21  
22  
23

#### 24 **References:**

- 25  
26 1. Krinsley JS. Association between hyperglycemia and increased hospital mortality in a  
27 heterogeneous population of critically ill patients. Mayo Clinic proceedings Mayo Clinic.  
28 2003; 78(12):1471-8  
29  
30
- 31  
32 2. Umpierrez GE, Isaacs SD, Bazargan N, You X, Thaler LM, Kitabchi AE. Hyperglycemia:  
33 an independent marker of in-hospital mortality in patients with undiagnosed diabetes. The  
34 Journal of clinical endocrinology and metabolism. 2002;87(3):978-82.  
35  
36  
37  
38
- 39  
40 3. Hypoglycaemia is associated with increased length of stay and mortality in people with  
41 diabetes who are hospitalized. Nirantharakumar K, Marshall T, Kennedy A, Narendran P,  
42 Hemming K, Coleman JJ. Diabet Med. 2012; 29(12):e445-8.  
43  
44  
45
- 46  
47 4. Hypoglycemia as a predictor of mortality in hospitalized elderly patients. Kagansky N,  
48 Levy S, Rimon E, et al. Arch Intern Med. 2003; 163(15):1825-9.  
49  
50
- 51  
52 5. Hypoglycemia and clinical outcomes in patients with diabetes hospitalized in the general  
53 ward. Turchin A, Matheny ME, Shubina M, Scanlon JV, Greenwood B, Pendergrass ML.  
54 Diabetes Care. 2009; 32(7):1153-7.  
55  
56  
57  
58  
59  
60

- 1  
2  
3 6. Intensive versus conventional glucose control in critically ill patients. NICE-SUGAR  
4 Study Investigators, Finfer S, Chittock DR, Su SY, et al. N Engl J Med. 2009; 360(13):1283-  
5 97.  
6  
7
- 8  
9  
10 7. Intensive insulin therapy and mortality among critically ill patients: a meta-analysis  
11 including NICE-SUGAR study data. Griesdale DE, de Souza RJ, van Dam RM, et al. CMAJ.  
12 2009; 180(8):821-7.  
13
- 14  
15  
16 8. Intensive glucose control and hypoglycaemia: a new cardiovascular risk factor? Rana OA,  
17 Byrne CD, Greaves K. Heart. 2013 May 22; [Epub ahead of print]  
18
- 19  
20  
21 9. National Diabetes Inpatient Audit (NaDIA) - 2012. Available at  
22 <http://www.hscic.gov.uk/catalogue/PUB10506>. Last accessed 04/10/2013.  
23  
24
- 25  
26  
27 10. Standards of medical care in diabetes-2013. American Diabetes Association. Diabetes  
28 Care. 2013; 36 Suppl 1:S11-66.  
29
- 30  
31  
32 11. Diurnal temporal patterns of hypoglycaemia in hospitalized people with diabetes may  
33 reveal potentially correctable factors. Kerry C, Mitchell S, Sharma S, Scott A, Rayman G.  
34 Diabet Med. 2013 30(12):1403-1406.  
35  
36
- 37  
38  
39 12. The hospital management of hypoglycaemia in adults with diabetes mellitus. Joint British  
40 Diabetes Society Guideline. Available at <http://www.diabetologists-abcd.org.uk/JBDS/JBDS.htm>.  
41 Last accessed 25-01-2014.  
42  
43
- 44  
45  
46 13. Hypoglycemia requiring ambulance services in patients with type 2 diabetes is associated  
47 with increased long-term mortality. Parsaik AK, Carter RE, Myers LA, Basu A, Kudva YC.  
48 Endocr Pract. 2013; 19(1):29-35.  
49
- 50  
51  
52 14. Sulphonyurea as a cause of severe hypoglycaemia in the community. Ng JM, Mellor DD,  
53 Masson EA, Allan BJ. Prim Care Diabetes. 2010; 4(1):61-3.  
54
- 55  
56  
57 15. Characteristics of patients with sulphonurea-induced hypoglycemia. Schejter YD, Turvall  
58 E, Ackerman Z. J Am Med Dir Assoc. 2012; 13(3):234-8.  
59  
60

1  
2  
3  
4  
5  
6  
7  
8  
9  
10  
11  
12  
13  
14  
15  
16  
17  
18  
19  
20  
21  
22  
23  
24  
25  
26  
27  
28  
29  
30  
31  
32  
33  
34  
35  
36  
37  
38  
39  
40  
41  
42  
43  
44  
45  
46  
47  
48  
49  
50  
51  
52  
53  
54  
55  
56  
57  
58  
59  
60

16. Hypoglycemia in hospitalized patients treated with sulfonylureas. Deussenberry CM, Coley KC, Korytkowski MT, Donihi AC. *Pharmacotherapy* 2012; 32(7): 613-7.

17. Lack of confidence among trainee doctors in the management of diabetes: the Trainees Own Perception of Delivery of Care (TOPDOC) Diabetes Study. George JT, Warriner D, McGrane DJ, et al; TOPDOC Diabetes Study Team. *QJM*. 2011; 104(9):761-6.

18. Randomized study of basal-bolus insulin therapy in the inpatient management of patients with type 2 diabetes (RABBIT 2 trial). Umpierrez GE, Smiley D, Zisman A, et al. *Diabetes Care*. 2007; 30(9):2181-6.

19. Randomized study of basal-bolus insulin therapy in the inpatient management of patients with type 2 diabetes undergoing general surgery (RABBIT 2 surgery). Umpierrez GE, Smiley D, Jacobs S, et al. *Diabetes Care*. 2011; 34(2):256-61.

20. Safer administration of insulin: summary of a safety report from the National Patient Safety Agency. Lamont T, Cousins D, Hillson R, Bischler A, Terblanche M. *BMJ*. 2010; 341:c5269.

21. Prescribing errors in diabetes. Cox RA, Ferner ER. *Br J Diabetes Vasc Dis* 2009; 9:84–88

22. Insulin, hospitals and harm: a review of patient safety incidents reported to the National Patient Safety Agency. Cousins D, Rosario C, Scarpello J. *Clin Med*. 2011; 11(1):28-30.

23. Serious harm from inpatient hypoglycaemia: a survey of hospitals in the UK. Rajendran R, Rayman G. *Diabet Med*. 2014 April 7 doi: 10.1111/dme.12457. [Epub ahead of print]

24. E-prescribing: clinical implications for patients with diabetes. Smith M, Dang D, Lee J. *J Diabetes Sci Technol*. 2009; 3(5):1215-8.

25. Clinical decision support systems in the care of inpatients with diabetes in non-critical care setting: systematic review. Nirantharakumar K, Chen YF, Marshall T, Webber J, Coleman JJ. *Diabet Med*. 2012; 29(6):698-708.



1  
2  
3  
4  
5  
6  
7  
8  
9  
10  
11  
12  
13  
14  
15  
16  
17  
18  
19  
20  
21  
22  
23  
24  
25  
26  
27  
28  
29  
30  
31  
32  
33  
34  
35  
36  
37  
38  
39  
40  
41  
42  
43  
44  
45  
46  
47  
48  
49  
50  
51  
52  
53  
54  
55  
56  
57  
58  
59  
60

26. NHS Diabetes guideline for the perioperative management of the adult patient with diabetes. Dhatariya K, Levy N, Kilvert A, et al; Joint British Diabetes Societies. Diabet Med. 2012; 29(4):420-33.

For peer review only

Table 1:

| Variable                                                                                              | Each individual Trust data |        |             |             |       |             |             |             |             |             |             | Combined data across all Trusts |      |
|-------------------------------------------------------------------------------------------------------|----------------------------|--------|-------------|-------------|-------|-------------|-------------|-------------|-------------|-------------|-------------|---------------------------------|------|
|                                                                                                       | 1                          | 2      | 3           | 4           | 5     | 6           | 7           | 8           | 9           | 10          | 11          |                                 |      |
| Number of beds*                                                                                       | 537                        | 690    | 344         | 264         | 449   | 939         | 680         | 997         | 274         | 690         | 293         | 6157                            |      |
| Diabetes Inpatient Specialist Nurse time devoted to inpatient diabetes care†                          | 75.5                       | 97     | 30          | 20          | 20    | 78          | 75          | 52          | 10          | 32          | 48.5        | 538                             |      |
| Number of 'at risk' subjects                                                                          | All                        | 85     | 82          | 40          | 43    | 67          | 156         | 73          | 155         | 50          | 74          | 41                              | 866  |
|                                                                                                       | Insulin                    | 50     | 56          | 26          | 18    | 39          | 103         | 44          | 96          | 29          | 52          | 28                              | 541  |
|                                                                                                       | Sulphonylurea              | 32     | 25          | 12          | 22    | 24          | 44          | 22          | 52          | 18          | 20          | 12                              | 283  |
|                                                                                                       | Both‡                      | 3      | 1           | 2           | 3     | 4           | 9           | 7           | 7           | 3           | 2           | 1                               | 42   |
| Number of hypoglycaemic readings                                                                      | All                        | 334    | 163         | 136         | 115   | 264         | 432         | 234         | 316         | 159         | 198         | 170                             | 2521 |
|                                                                                                       | Insulin                    | 219    | 107         | 90          | 61    | 161         | 257         | 161         | 199         | 96          | 118         | 125                             | 1594 |
|                                                                                                       | Sulphonylurea              | 105    | 55          | 34          | 51    | 89          | 154         | 61          | 104         | 46          | 68          | 34                              | 801  |
|                                                                                                       | Both‡                      | 10     | 1           | 12          | 3     | 14          | 21          | 12          | 13          | 17          | 12          | 11                              | 126  |
|                                                                                                       | Mild hypoglycaemia         | 239    | 124         | 86          | 81    | 177         | 309         | 165         | 203         | 103         | 134         | 108                             | 1729 |
|                                                                                                       | Severe hypoglycaemia       | 95     | 39          | 50          | 34    | 87          | 123         | 69          | 113         | 56          | 64          | 62                              | 792  |
| Hypoglycaemia per 100 bed ratio§                                                                      | All                        | 62.2   | 23.6        | 39.5        | 43.6  | 58.8        | 46          | 34.4        | 31.7        | 58          | 28.7        | 58                              | 41   |
|                                                                                                       | Mild hypoglycaemia         | 44.5   | 18          | 25          | 30.7  | 39.4        | 32.9        | 24.3        | 20.4        | 37.6        | 19.4        | 36.9                            | 28.1 |
|                                                                                                       | Severe hypoglycaemia       | 17.7   | 5.6         | 14.5        | 12.9  | 19.4        | 13.1        | 10.1        | 11.3        | 20.4        | 9.3         | 21.1                            | 12.9 |
| Hypoglycaemic readings per subject                                                                    | Median                     | 2      | 1           | 2           | 2     | 3           | 2           | 2           | 2           | 2           | 1           | 2                               | 2    |
|                                                                                                       | Mean                       | 3.93   | 1.99        | 3.4         | 2.7   | 3.94        | 2.77        | 3.21        | 2.04        | 3.18        | 2.68        | 4.15                            | 2.91 |
|                                                                                                       | Range                      | 1-29   | 1-9         | 1-11        | 1-23  | 1-18        | 1-16        | 1-13        | 1-11        | 1-12        | 1-14        | 1-30                            | 1-30 |
| Subjects with ≥5 readings of hypoglycaemia during the study period                                    | 20                         | 7      | 10          | 5           | 18    | 27          | 15          | 15          | 11          | 15          | 11          | 154                             |      |
| Frequency of glucose monitoring                                                                       | Insulin                    | BD-QDS | QDS and 3am | QDS         | QDS   | BD-QDS      | QDS         | QDS         | QDS         | QDS         | QDS         | QDS                             | -    |
|                                                                                                       | Sulphonylurea              | BD-QDS | QDS and 3am | BD-QDS      | BD    | BD-QDS      | BD-QDS      | QDS         | BD-QDS      | QDS         | OD-QDS      | QDS                             | -    |
| Hospital meal timings                                                                                 | Breakfast                  | 7:30   | 7:00        | 7:00-8:00   | 8:30  | 7:30-8:30   | 7:00-9:00   | 7:30-8:30   | 7:45-8:30   | 7:45-8:30   | 7:00-8:00   | 8:00                            | -    |
|                                                                                                       | Afternoon meal             | 12:00  | 12:00       | 12:00-13:00 | 12:15 | 12:00-13:00 | 12:00-14:00 | 11:30-12:45 | 12:00-13:00 | 12:00-13:00 | 12:00-13:00 | 12:00                           | -    |
|                                                                                                       | Evening meal               | 17:00  | 17:00       | 18:00-19:00 | 17:00 | 17:00-18:00 | 17:00-19:00 | 16:30-17:45 | 17:00-18:00 | 17:00-18:00 | 17:00-18:00 | 17:00                           | -    |
| Time period of hypoglycaemic readings                                                                 |                            |        |             |             |       |             |             |             |             |             |             |                                 |      |
| Daytime                                                                                               | 09:00-14:59                | 75     | 30          | 25          | 8     | 33          | 61          | 45          | 46          | 25          | 14          | 31                              | 393  |
|                                                                                                       | 15:00-20:59                | 50     | 33          | 29          | 25    | 51          | 78          | 46          | 65          | 24          | 41          | 47                              | 489  |
| 09:00-20:59                                                                                           |                            | 125    | 63          | 54          | 33    | 84          | 139         | 91          | 111         | 49          | 55          | 78                              | 882  |
| Night-time                                                                                            | 21:00-02:59                | 93     | 36          | 36          | 34    | 69          | 133         | 68          | 76          | 45          | 51          | 45                              | 686  |
|                                                                                                       | 03:00-08:59                | 116    | 64          | 46          | 48    | 111         | 160         | 75          | 129         | 65          | 92          | 47                              | 953  |
|                                                                                                       | 21:00-08:59                | 209    | 100         | 82          | 82    | 180         | 293         | 143         | 205         | 110         | 143         | 92                              | 1639 |
| Percentage of night-time hypoglycaemia                                                                | 62.6                       | 61.3   | 60.3        | 71.3        | 68.2  | 67.8        | 61.1        | 64.9        | 69.2        | 72.2        | 54.1        | 65                              |      |
| *Bed numbers exclude paediatric, maternity and day case units                                         |                            |        |             |             |       |             |             |             |             |             |             |                                 |      |
| †Average Diabetes Inpatient Specialist Nurse time (hours per week) devoted to inpatient diabetes care |                            |        |             |             |       |             |             |             |             |             |             |                                 |      |
| ‡Subjects on both insulin and sulphonylurea therapy                                                   |                            |        |             |             |       |             |             |             |             |             |             |                                 |      |
| §Calculated as 100 * number of hypoglycaemic readings ÷ number of beds                                |                            |        |             |             |       |             |             |             |             |             |             |                                 |      |
| No Trust guaranteed the provision of a bedtime snack for inpatients with diabetes                     |                            |        |             |             |       |             |             |             |             |             |             |                                 |      |

Table 2:

| Variable                                                                                 | All                          | Insulin                                  | Sulphonyl urea                           | Both Insulin and Sulphonylureas          |                                         |
|------------------------------------------------------------------------------------------|------------------------------|------------------------------------------|------------------------------------------|------------------------------------------|-----------------------------------------|
| Number of subjects                                                                       | 866                          | 541                                      | 283                                      | 42                                       |                                         |
| Number of hypoglycaemic readings (%)                                                     | All                          | 2521                                     | 1594                                     | 801                                      | 126                                     |
|                                                                                          | Severe hypoglycaemia         | 792 (31.4)                               | 572 (35.9)                               | 180 (22.5)                               | 40 (31.7)                               |
|                                                                                          | Mild hypoglycaemia           | 1729 (68.6)                              | 1022 (64.1)                              | 621 (77.5)                               | 86 (68.3)                               |
| Subjects with $\geq 5$ readings of hypoglycaemia per subject during the study period (%) | 154 (17.8)                   | 96 (17.7)                                | 49 (17.3)                                | 9 (21.4)                                 |                                         |
| p=0.923                                                                                  |                              |                                          |                                          |                                          |                                         |
| Number of hypoglycaemic readings per subject                                             | Mean $\pm$ SD (Range)        | 2.91 $\pm$ 3.16 (1-30)                   | 2.95 $\pm$ 3.29 (1-30)                   | 2.83 $\pm$ 2.89 (1-29)                   | 3 $\pm$ 3.21 (1-12)                     |
|                                                                                          | Median (Interquartile range) | 2 (1-3)                                  | 2 (1-3)                                  | 2 (1-4)                                  | 1 (1-3.25)                              |
| p=0.888                                                                                  |                              |                                          |                                          |                                          |                                         |
| Age (years)                                                                              | Mean $\pm$ SD (Range)        | 71 $\pm$ 16 (18-98)                      | 67 $\pm$ 18 (18-97)                      | 76 $\pm$ 10 (42-98)                      | 75 $\pm$ 9 (46-91)                      |
|                                                                                          | Median (Interquartile range) | 75 (64-82)                               | 73 (56-81)                               | 78 (70-83)                               | 77 (69-81)                              |
| p=0.0001                                                                                 |                              |                                          |                                          |                                          |                                         |
| HbA1c in mmol/mol (%)                                                                    | Mean [Range]                 | n=575*<br>69(8.5)<br>[28(4.7)-177(18.3)] | n=364*<br>73(8.8)<br>[28(4.7)-177(18.3)] | n=181*<br>60(7.6)<br>[33(5.2)-161(16.9)] | n=30*<br>73(8.8)<br>[46(6.4)-115(12.7)] |
|                                                                                          | Median [Interquartile range] | 64(8)<br>[53(7)-80(9.5)]                 | 69(8.5)<br>[56(7.3)-83(9.7)]             | 56(7.3)<br>(47(6.5)-66(8.2))             | 73(8.8)<br>[55(7.2)-86(10)]             |
| p=0.0001                                                                                 |                              |                                          |                                          |                                          |                                         |
| Length of stay (days)                                                                    | Mean $\pm$ SD (Range)        | n=862*<br>17 $\pm$ 17.1 (1-101)          | n=540*<br>16.1 $\pm$ 17 (1-101)          | n=282*<br>17 $\pm$ 16.2 (1-100)          | n=40*<br>25 $\pm$ 21.9 (1-82)           |
|                                                                                          | Median (Interquartile range) | 11 (5-22)                                | 10 (4-21)                                | 11 (6-23)                                | 20 (7-45)                               |
| p=0.098                                                                                  |                              |                                          |                                          |                                          |                                         |
| <b>Temporal pattern of hypoglycaemic readings</b>                                        |                              |                                          |                                          |                                          |                                         |
| Daytime hypoglycaemia                                                                    | 09:00-14:59                  | 393                                      | 296                                      | 84                                       | 13                                      |
|                                                                                          | 15:00-20:59                  | 489                                      | 352                                      | 114                                      | 23                                      |
|                                                                                          | Total 09:00-20:59            | 882                                      | 648                                      | 198                                      | 36                                      |
| Night-time hypoglycaemia (%)                                                             | 21:00-02:59                  | 686                                      | 478                                      | 179                                      | 29                                      |
|                                                                                          | 03:00-08:59                  | 953                                      | 468                                      | 424                                      | 61                                      |
|                                                                                          | Total 21:00-08:59            | 1639 (65)                                | 946 (59.3)                               | 603 (75.3)                               | 90 (71.4)                               |
| p=0.0001                                                                                 |                              |                                          |                                          |                                          |                                         |
| *Subjects in whom data available                                                         |                              |                                          |                                          |                                          |                                         |

1  
2  
3  
4  
5  
6  
7  
8  
9  
10  
11  
12  
13  
14  
15  
16  
17  
18  
19  
20  
21  
22  
23  
24  
25  
26  
27  
28  
29  
30  
31  
32  
33  
34  
35  
36  
37  
38  
39  
40  
41  
42  
43  
44  
45  
46  
47  
48  
49  
50  
51  
52  
53  
54  
55  
56  
57  
58  
59  
60

Temporal patterns of hypoglycaemic readings over the 24 hour period in the individual 11 NHS Trusts

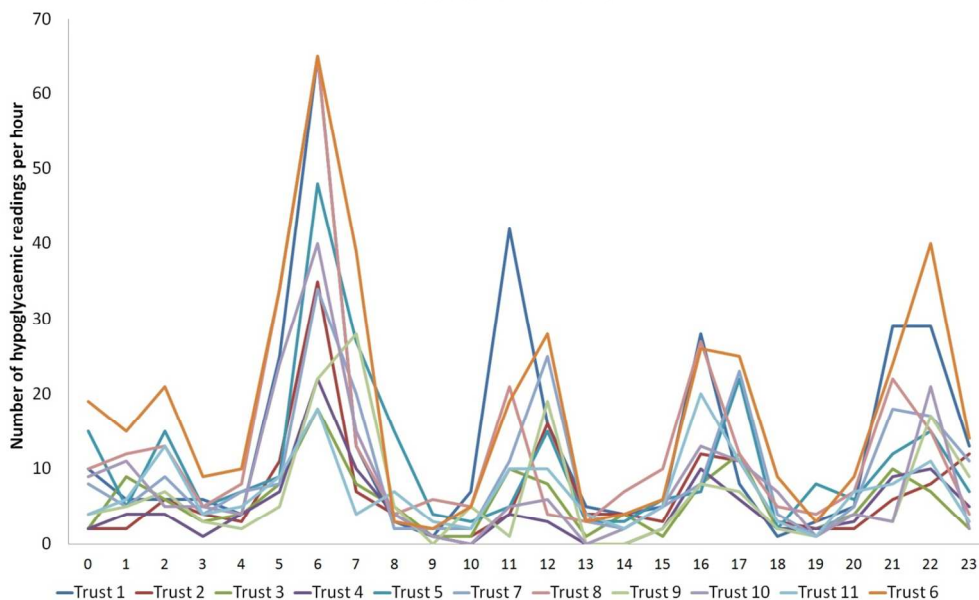

Temporal patterns of hypoglycaemic readings over the 24 hour period in the individual 11 NHS Trusts. The x axis represent the time period, for e.g. 0 represents the time period between 00:00 and 00:59 hours, 1 represents the time period between 01:00 and 01:59 hours etc. The y axis represents the number of hypoglycaemic readings occurring in that time period. The figure demonstrates very similar temporal patterns for all Trusts.  
133x90mm (300 x 300 DPI)

ew only

Temporal pattern of hypoglycaemic readings over the 24 hour period in all subjects on insulin, sulphonylureas and both

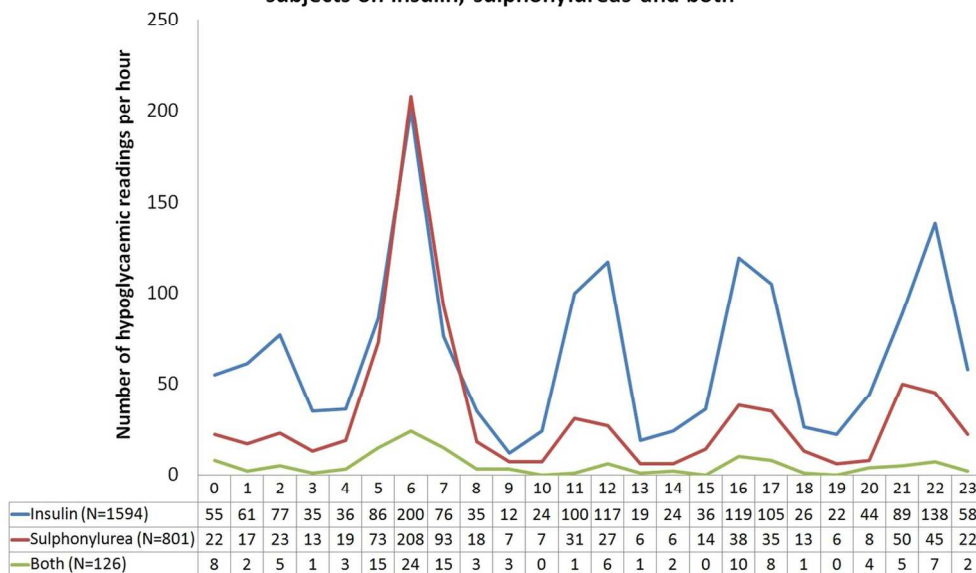

Temporal patterns of hypoglycaemic readings over the 24 hour period in all subjects on insulin, sulphonylureas and both. The x axis represent the time period, for e.g. 0 represents the time period between 00:00 and 00:59 hours, 1 represents the time period between 01:00 and 01:59 hours etc. The y axis represents the number of hypoglycaemic readings occurring in that time period. The figure demonstrates that the highest frequency occurs between 05:00 to 07:59 hours for both insulin and sulphonylurea therapies.

138x90mm (300 x 300 DPI)
